# Supplementary material for: Fruit-Surface Flavonoid Accumulation in Tomato Is Controlled by a SlMYB12-Regulated Transcriptional Network
Source: PLoS Genet. 2009 Dec 18;5(12):e1000777. doi: 10.1371/journal.pgen.1000777 (PMC2788616; doi:10.1371/journal.pgen.1000777)
Supplement: Table S1 — All transcripts identified by the microarray analysis as differentially expressed between the y mutant and wt fruit tissues. (0.20 MB XLS) [file pgen.1000777.s012.xls]

## Sheet: peel_y_down
Genes upregulated in the wild type (wt) peel vs. the y mutant peel
ProbeID	Cluster	Identifier (TC)	Summary	Pathway	Annotation	Br	Or	Red
LesAffx.49263.1.S1_at	6	AW220355	1_0_2	Carbohydrate metabolism	Xylose synthase
Les.4697.1.S1_at	5	BT013659.1	1_0_2	Carbohydrate metabolism	Putative DNA/RNA binding protein (pcp1)
Les.68.2.S1_a_at	11	BT013727.1	2_0_1	Carbohydrate metabolism	Endo-beta-1-4-D-glucanase
Les.3461.1.S1_at	14	TC169884	1_0_2	Carbohydrate metabolism	Cell-wall invertase
Les.3625.1.S1_at	6	TC183891	2_0_1	Carbohydrate metabolism	Putative neutral/alkaline invertase
Les.2187.1.A1_at	17	TC185081	1_0_2	Carbohydrate metabolism	Beta-mannan endohydrolase
LesAffx.70712.1.S1_at	17	TC170828	1_0_2	DNA metabolism	Histone H1-1
LesAffx.17178.1.A1_at	2	TC188722	1_0_2	DNA metabolism	Histone-lysine N-methyltransferase
LesAffx.45975.1.S1_at	14	BI209975	3_0_0	Fatty acid metabolism	Lipase
Les.1977.2.S1_at	17	TC173058	1_0_2	Fatty acid metabolism	Acyltransferase
Les.5879.1.S1_at	13	TC174273	2_0_1	Fatty acid metabolism	Alpha-dioxygenase 2
LesAffx.69088.1.S1_at	13	TC174706	1_0_2	Fatty acid metabolism	3-hydroxyisobutyryl-coenzyme A hydrolase
LesAffx.9764.1.S1_at	14	TC176438	1_0_2	Fatty acid metabolism	Cytochrome b5
Les.221.1.S1_at	14	TC170161	1_0_2	Hormone metabolism	1-aminocyclopropane-1-carboxylate oxidase (ACO)
Les.3225.3.S1_at	4	TC170230	1_0_2	Hormone metabolism	1-aminocyclopropane-1-carboxylate oxidase (ACO)
Les.2474.2.A1_at	17	TC186460	1_0_2	Hormone metabolism	DWARF1/DIMINUTO
Les.91.1.S1_at	13	TC169881	1_0_2	Isoprenoid metabolism	9-cis-epoxycarotenoid dioxygenase (NCED)
Les.3544.1.S1_at	6	TC170778	1_0_2	Isoprenoid metabolism	Beta-carotene hydroxylase (CRTR-B2)
Les.63.1.S1_at	6	TC175838	1_0_2	Isoprenoid metabolism	Gibberellin 20-oxidase-3
Les.4277.2.S1_at	17	TC177327	1_0_2	Isoprenoid metabolism	S-adenosyl-methionine-sterol-C-methyltransferase
Les.4277.1.A1_at	17	TC181125	1_0_2	Isoprenoid metabolism	S-adenosyl-methionine-sterol-C-methyltransferase
Les.3113.1.S1_at	14	TC186636	3_0_0	Isoprenoid metabolism	C-4 sterol methyl oxidase (SMO)
Les.4703.1.S1_at	3	BT012803.1	1_0_2	Miscellaneous	Tubulin beta-1 chain
Les.3743.1.S1_at	13	TC169968	1_0_2	Miscellaneous	Acid phosphatase 1 precursor
Les.3555.1.S1_at	17	TC170195	1_0_2	Miscellaneous	Lethal leaf spot 1-like protein
Les.4011.3.S1_at	11	TC181696	1_0_2	Miscellaneous	Glutamyl-tRNA reductase 1
Les.450.1.S1_at	6	TC181810	1_0_2	Miscellaneous	P27KIP1-related-protein 2
LesAffx.68547.1.S1_at	14	TC188803	2_0_1	Miscellaneous	Arsenate reductase
LesAffx.44580.1.A1_at	11	TC190061	1_0_2	Miscellaneous	Epsin
Les.5706.1.S1_at	13	BT014421.1	2_0_1	Phenylpropanoids/flavonoids	Isoflavone reductase
LesAffx.44563.1.A1_at	13	CK715539	1_0_2	Phenylpropanoids/flavonoids	Chorismate mutase/chloroplast precursor (CM1)
Les.4271.2.S1_at	14	TC170429	3_0_0	Phenylpropanoids/flavonoids	Phenylalanine ammonia-lyase (PAL)
Les.3650.1.S1_at	14	TC170658	3_0_0	Phenylpropanoids/flavonoids	Chalcone synthase (CHS1)
Les.4979.1.S1_at	13	TC170723	1_0_2	Phenylpropanoids/flavonoids	Cinnamoyl CoA reductase (CCR)
LesAffx.66380.1.S1_at	6	TC171536	1_0_2	Phenylpropanoids/flavonoids	Glucosyltransferase (GT)
LesAffx.15898.1.S1_at	6	TC172281	1_0_2	Phenylpropanoids/flavonoids	UDP-xylose phenolic glycosyltransferase
LesAffx.10955.1.S1_at	14	TC172766	1_0_2	Phenylpropanoids/flavonoids	Prephenate dehydratase (PDH)
LesAffx.10955.3.S1_at	14	TC172766	2_0_1	Phenylpropanoids/flavonoids	Prephenate dehydratase (PDH)
Les.4271.1.S1_at	14	TC172772	2_0_1	Phenylpropanoids/flavonoids	Phenylalanine ammonia-lyase (PAL)
Les.3085.1.S1_at	14	TC172800	2_0_1	Phenylpropanoids/flavonoids	Flavonol synthase (FLS)
Les.5848.1.A1_at	14	TC173193	2_0_1	Phenylpropanoids/flavonoids	4-coumarate CoA ligase (4CL)
Les.5848.2.S1_at	14	TC173193	2_0_1	Phenylpropanoids/flavonoids	4-coumarate CoA ligase (4CL)
Les.2633.1.A1_at	14	TC176277	3_0_0	Phenylpropanoids/flavonoids	Flavonoid 3-glucosyl transferase (3GT)
LesAffx.63776.1.S1_at	14	TC176549	3_0_0	Phenylpropanoids/flavonoids	Flavonoid 3-glucosyl transferase (3GT)
LesAffx.31836.1.S1_at	6	TC178150	2_0_1	Phenylpropanoids/flavonoids	Cinnamoyl CoA reductase-like (CCR)
Les.1968.1.A1_at	14	TC178705	3_0_0	Phenylpropanoids/flavonoids	Chalcone isomerase (CHI)
Les.5842.1.S1_at	14	TC179039	3_0_0	Phenylpropanoids/flavonoids	Rhamnosyltransferase (RT)
LesAffx.34276.1.S1_at	14	TC180112	3_0_0	Phenylpropanoids/flavonoids	Cinnamoyl CoA reductase-like (CCR) / weakly similar
Les.2278.1.S1_at	14	TC180957	3_0_0	Phenylpropanoids/flavonoids	Flavanone 3-hydroxylase (F3H)
LesAffx.51045.1.S1_at	14	TC181932	1_0_2	Phenylpropanoids/flavonoids	Isoflavone reductase
LesAffx.63984.1.S1_at	13	TC183733	2_0_1	Phenylpropanoids/flavonoids	P-coumaroyl 3'-hydroxylase (C3H)
Les.842.1.S1_at	3	TC187284	1_0_2	Phenylpropanoids/flavonoids	Arbutin synthase
LesAffx.11323.1.A1_at	2	AI899336	1_0_2	Photosynthesis	Cytochrome b6-f complex subunit 4
Les.3046.1.S1_at	14	TC171898	1_0_2	Photosynthesis	RuBisCO
LesAffx.65143.1.S1_at	2	TC190272	1_0_2	Photosynthesis	Cytochrome b559 beta subunit
Les.5245.1.S1_at	14	BT013560.1	2_0_1	Primary metabolism	Malate dehydrogenase
Les.3039.1.S1_at	14	TC170008	1_0_2	Primary metabolism	Phospho-2-dehydro-3-deoxyheptonate aldolase 2 chloroplast precursor
LesAffx.5010.1.S1_a_at	13	TC180478	1_0_2	Primary metabolism	Cytochrome b561
Les.3358.1.S1_at	3	TC180850	1_0_2	Primary metabolism	Arginine decarboxylase
LesAffx.41381.1.S1_at	2	AI894551	1_0_2	Protein metabolism	Eukaryotic initiation factor 4A-14
Les.3228.1.S1_at	11	TC171575	2_0_1	Protein metabolism	Cysteine protease
LesAffx.68108.1.S1_at	17	TC174295	1_0_2	Protein metabolism	Poly(A)-binding protein C-terminal interacting protein 6
Les.702.1.S1_at	6	TC175504	1_0_2	Protein metabolism	S-adenosylmethionine decarboxylase (SamDC)
LesAffx.11659.1.A1_at	13	TC179086	1_0_2	Protein metabolism	Fumarylacetoacetase
LesAffx.27206.1.S1_at	14	BE459326	2_0_1	Response to stress/defence	Glutathione S-transferase
Les.5672.1.S1_at	14	BT014363.1	2_0_1	Response to stress/defence	Putative protein kinase
LesAffx.63074.1.S1_at	3	TC170184	1_0_2	Response to stress/defence	Avr9/Cf-9 rapidly elicited protein
Les.266.1.S1_a_at	14	TC170549	1_0_2	Response to stress/defence	Prosystemin
Les.3777.1.S1_at	10	TC170993	1_0_2	Response to stress/defence	Twi1 protein
Les.3581.1.S1_at	6	TC172137	1_0_2	Response to stress/defence	Class II small heat shock protein (Le-HSP17.6)
LesAffx.3163.1.S1_at	17	TC172334	1_0_2	Response to stress/defence	Zinc finger A20 and AN1 domain
Les.2026.1.S1_at	17	TC172722	1_0_2	Response to stress/defence	Ring domain containing protein
LesAffx.58365.1.S1_at	6	TC173455	1_0_2	Response to stress/defence	Heat shock protein binding
Les.182.1.S1_at	14	TC174874	1_0_2	Response to stress/defence	Benzoyl transferase
LesAffx.66253.1.S1_at	13	TC177496	1_0_2	Response to stress/defence	NL0D protein
Les.2121.1.A1_at	14	TC179101	1_0_2	Response to stress/defence	Hydroxyproline-rich systemin precursor
Les.1645.1.A1_at	11	TC185053	1_0_2	Response to stress/defence	Glutathione S-transferase
LesAffx.47142.1.S1_at	1	TC187410	2_0_1	Response to stress/defence	Glutathione S-transferase
LesAffx.15265.1.S1_at	17	TC173453	1_0_2	Other secondary metabolism	Carnitine racemase
LesAffx.54483.1.S1_at	14	TC180927	1_0_2	Other secondary metabolism	S-adenosylmethionine-dependent methyltransferase
LesAffx.46142.1.S1_at	2	TC182343	1_0_2	Other secondary metabolism	S-adenosylmethionine-dependent methyltransferase
LesAffx.28505.1.S1_at	6	TC184428	1_0_2	Other secondary metabolism	Perakine reductase
LesAffx.65870.1.S1_at	6	TC190707	1_0_2	Other secondary metabolism	Perakine reductase
LesAffx.24096.1.S1_at	17	AJ785329	1_0_2	Signal transduction	Gibberellin induced protein
Les.4613.1.S1_at	17	BT013526.1	1_0_2	Signal transduction	Petunia Shaggy kinase 4 (PSK4)
Les.4312.2.S1_at	4	TC177501	1_0_2	Signal transduction	Receptor-like protein kinase
Les.1331.1.A1_at	14	TC189377	1_0_2	Signal transduction	Protein kinase
Les.1871.1.S1_at	17	TC170191	2_0_1	Transcription factor activity	RING-H2 finger protein
LesAffx.64675.1.S1_a_at	3	TC172779	1_0_2	Transcription factor activity	BHLH transcription factor
Les.41.1.S1_at	14	TC174616	2_0_1	Transcription factor activity	THM27 - MYB transcription factor (TMH27)
LesAffx.55861.1.S1_at	17	TC179663	1_0_2	Transcription factor activity	Zinc-finger transcription factor
LesAffx.2632.2.S1_at	17	TC181595	1_0_2	Transcription factor activity	Homeobox transcription factor
Les.546.1.A1_at	7	TC182353	1_0_2	Transcription factor activity	WRKY transcription factor
LesAffx.24696.1.S1_at	6	TC182754	1_0_2	Transcription factor activity	Heat shock transcription factor
LesAffx.50750.1.S1_at	14	TC184379	2_0_1	Transcription factor activity	SlMYB4-like - MYB transcription factor
Les.46.1.S1_at	13	X60760.1	1_0_2	Transcription factor activity	MADS-box transcription factor (TDR8)
Les.5279.1.S1_at	10	BT013629.1	1_0_2	Transporter activity	Amino acid transporter protein
Les.4073.1.S1_at	17	TC176558	1_0_2	Transporter activity	Amino acid transporter (LeAAP2)
LesAffx.55216.1.S1_at	4	TC176855	1_0_2	Transporter activity	Auxin transporter
LesAffx.12670.1.S1_at	5	TC178428	1_0_2	Transporter activity	Carbohydrate transporter
Les.2044.2.S1_at	4	TC186221	1_0_2	Transporter activity	Potassium channel
Les.701.1.A1_at	5	BG627000	1_0_2	Unknown	Unknow
Les.1789.1.A1_at	14	BG629052	2_0_1	Unknown	Glutathione-dependent formaldehyde dehydrogenase
Les.1945.1.A1_at	3	BG630386	1_0_2	Unknown	Unknow
Les.5052.1.S1_at	6	BT013183.1	1_0_2	Unknown	Unknow
Les.5198.1.S1_at	6	BT013491.1	1_0_2	Unknown	Unknow
Les.3687.1.S1_at	10	TC170035	1_0_2	Unknown	Tyramine N-hydroxycinnamoyl transferase (THT7-1)
LesAffx.26054.1.S1_at	14	TC170400	1_0_2	Unknown	Unknow
LesAffx.71654.1.S1_at	3	TC170875	1_0_2	Unknown	Unknow
LesAffx.69782.1.S1_at	19	TC170997	1_0_2	Unknown	Unknow
Les.3591.1.S1_at	2	TC171069	1_0_2	Unknown	Unknow
Les.2131.1.A1_at	12	TC172269	1_0_2	Unknown	Unknow
LesAffx.37595.1.S1_at	12	TC172871	1_0_2	Unknown	Unknow
LesAffx.65922.1.S1_at	2	TC173231	1_0_2	Unknown	Unknow
Les.1699.2.S1_at	3	TC173239	1_0_2	Unknown	Unknow
Les.1699.1.A1_at	3	TC177909	1_0_2	Unknown	Unknow
Les.2268.1.A1_at	17	TC178916	3_0_0	Unknown	Putative glycine-rich RNA binding protein
Les.3343.2.S1_at	17	TC179590	1_0_2	Unknown	Unknow
Les.4077.1.S1_at	14	TC179647	1_0_2	Unknown	Metallothionein-like protein type 2 A (LeMT(A))
Les.4355.1.S1_at	17	TC182993	1_0_2	Unknown	Unknow
Les.2643.1.S1_at	2	TC183665	1_0_2	Unknown	Unknow
LesAffx.53966.1.S1_at	17	TC184370	1_0_2	Unknown	Glycine-rich protein (LeGRP1)
Les.2344.1.A1_at	6	TC185553	1_0_2	Unknown	Anther-specific protein
LesAffx.41862.1.S1_at	3	TC185612	1_0_2	Unknown	Hydrolase
LesAffx.62549.1.S1_at	3	TC186947	1_0_2	Unknown	Hydrolase
Les.4062.1.S1_at	6	TC187049	1_0_2	Unknown	Unknow
LesAffx.61398.1.S1_at	14	TC187382	3_0_0	Unknown	Unknow
Les.3142.1.A1_at	6	TC187735	1_0_2	Unknown	Unknow
LesAffx.28195.1.S1_at	3	TC189675	1_0_2	Unknown	Hydrolase
Les.4034.1.A1_at	6	TC189976	1_0_2	Unknown	Ripening regulated protein(DDTFR20)
Les.4034.1.S1_at	6	TC189976	2_0_1	Unknown	Ripening regulated protein(DDTFR20)
Les.4046.1.S1_at	6	Z29109.1	2_0_1	Unknown	Signal recognition particle 7S RNA (SRP)

## Sheet: peel_y_up
Genes upregulated in the y peel vs. wild type (wt) peel
ProbeID	Cluster	Identifier (TC)	Summary	pathway	Annotation	Br	Or	Red
Les.4583.1.S1_at	3	BT012697.1	0_1_2	Carbohydrate metabolism	Nucleotide sugar epimerase-like protein
Les.5081.1.S1_at	3	BT013237.1	0_2_1	Carbohydrate metabolism	Beta-D-glucan exohydrolase-like protein
Les.5131.1.S1_at	3	BT013344.1	0_1_2	Carbohydrate metabolism	Isoamylase
Les.3187.1.S1_at	3	BT013477.1	0_1_2	Carbohydrate metabolism	Glycolate oxidase
Les.5374.1.S1_at	5	BT013799.1	0_1_2	Carbohydrate metabolism	Sugar transporter
Les.3669.1.S1_at	17	TC169844	0_1_2	Carbohydrate metabolism	Sucrose synthase
Les.3697.1.S1_at	4	TC170058	0_1_2	Carbohydrate metabolism	xyloglucan endotransglycosylase (LeXET2)
LesAffx.10299.1.S1_at	4	TC181693	0_2_1	Carbohydrate metabolism	Putative sorbitol transporter
Les.2844.2.A1_at	6	TC182123	0_1_2	Carbohydrate metabolism	Beta-amylase
Les.204.1.S1_at	3	TC188019	0_1_2	Carbohydrate metabolism	ADP-glucose pyrophosphorylase small subunit
Les.276.1.S1_at	4	TC188444	0_1_2	Carbohydrate metabolism	Xyloglucan endotransglycosylase precursor
LesAffx.846.2.S1_at	3	CK715974	0_1_2	Cell wall	Pectinacetylesterase precursor
Les.3483.1.S1_at	3	TC169863	0_1_2	Cell wall	Arabinosidase ARA-1
Les.4449.1.S1_s_at	6	TC169920	0_1_2	Cell wall	Endo-beta-mannanase
Les.369.1.S1_at	3	TC171915	0_2_1	Cell wall	Expansin precursor
Les.4439.1.S1_at	3	TC175333	0_1_2	DNA metabolism	H3 histone
Les.3209.1.S1_at	3	TC177102	0_1_2	DNA metabolism	H4 histone
Les.1287.1.A1_at	6	TC179140	0_1_2	DNA metabolism	H2A histone
LesAffx.36049.1.S1_at	3	AW039066	0_3_0	Fatty acid metabolism	Lipase (EXL1)
Les.4906.1.S1_at	3	BT012874.1	0_2_1	Fatty acid metabolism	Lipase (EXL2)
Les.4187.1.S1_at	3	TC171195	0_1_2	Fatty acid metabolism	Non-specific lipid transfer protein
Les.507.1.S1_at	3	TC171480	0_1_2	Fatty acid metabolism	Enoyl-ACP reductase
Les.4467.1.S1_at	3	TC172218	0_1_2	Fatty acid metabolism	Lipid transfer protein
Les.2038.1.A1_at	3	TC180145	0_1_2	Fatty acid metabolism	GDSL-motif lipase/hydrolase
LesAffx.65821.1.S1_at	4	TC180384	0_2_1	Fatty acid metabolism	Esterase/lipase/thioesterase
Les.1058.1.S1_at	3	TC183551	0_1_2	Fatty acid metabolism	Squalene monooxygenase
Les.192.1.A1_at	3	AI780448	0_1_2	Hormone metabolism	Drm3-like protein
Les.5930.1.S1_at	3	CK716170	0_1_2	Hormone metabolism	Putative short-chain type alcohol dehydrogenase
Les.5.1.S1_a_at	3	TC170673	0_1_2	Hormone metabolism	Allene oxide synthase
LesAffx.1861.4.S1_at	3	TC172010	0_1_2	Hormone metabolism	1-aminocyclopropane-1-carboxylate oxidase activity
Les.3958.1.S1_at	20	TC177173	0_1_2	Isoprenoid metabolism	Violaxanthin de-epoxidase (VDE)
Les.790.1.A1_at	6	TC179656	0_1_2	Miscellaneous	Ferric reductase
Les.1997.1.S1_at	3	TC187785	0_1_2	Miscellaneous	CALRETICULIN 3 (CTR3) calcium ion binding
Les.4798.1.S1_at	3	BT013872.1	0_1_2	Phenylpropanoids/flavonoids	Phenylacetaldehyde reductase (PAR2)
LesAffx.344.6.S1_at	3	TC172671	0_1_2	Phenylpropanoids/flavonoids	Acyltransferase
Les.4412.1.A1_at	20	TC181836	0_1_2	Phenylpropanoids/flavonoids	Flavanone 3-hydroxylase (F3H)
Les.695.1.A1_at	20	TC181836	0_1_2	Phenylpropanoids/flavonoids	Flavanone 3-hydroxylase (F3H)
Les.2478.1.S1_at	3	AI780323	0_1_2	Photosynthesis	Chlorophyll a-b binding protein 3C-like
Les.4492.2.S1_at	3	TC170579	0_1_2	Photosynthesis	Chlorophyll a-b binding protein CP24 10B chloroplast precursor
Les.4083.1.S1_at	3	TC173972	0_1_2	Photosynthesis	Chlorophyll a-b binding protein 7 chloroplast precursor
Les.5221.1.S1_at	3	BT013523.1	0_1_2	Primary metabolism	Chlorophyllase-2
Les.3072.1.S1_at	3	TC179722	0_1_2	Primary metabolism	Glyceraldehyde-3-phosphate dehydrogenase A subunit
Les.4803.1.S1_at	19	BT013418.1	0_2_1	Protein metabolism	Proline oxidase/dehydrogenase
Les.5240.1.S1_at	3	BT013554.1	0_1_2	Protein metabolism	Subtilisin-like protease
Les.5648.1.S1_at	16	BT014316.1	0_1_2	Protein metabolism	Cysteine proteinase
Les.1422.1.S1_at	4	TC169890	0_1_2	Protein metabolism	Cysteine proteinase
Les.2960.1.A1_at	3	TC175959	0_1_2	Protein metabolism	Carboxypeptidase
Les.3619.1.S1_at	6	TC178155	0_1_2	Protein metabolism	Ethylene-responsive proteinase inhibitor 1 precursor
Les.178.1.S1_at	3	BT012841.1	0_1_2	Response to stress/defence	Polygalacturonase inhibitor protein precursor
Les.4496.1.S1_at	3	TC170338	0_1_2	Response to stress/defence	Pathogenesis-related protein
Les.4307.1.S1_at	2	TC170583	0_1_2	Response to stress/defence	PR5-like protein
Les.3739.1.S1_at	6	TC172016	0_1_2	Response to stress/defence	Small heat shock protein
Les.3677.1.S1_at	6	TC172124	0_1_2	Response to stress/defence	Small heat shock protein
LesAffx.46815.2.S1_at	3	TC173366	0_1_2	Response to stress/defence	Leucine rich repeat protein precursor
LesAffx.62593.1.S1_at	3	TC175056	0_1_2	Response to stress/defence	Avr9/Cf-9 rapidly elicited protein
LesAffx.69215.1.S1_at	3	TC181576	0_1_2	Response to stress/defence	Polygalacturonase inhibitor-like protein
LesAffx.344.5.S1_at	16	TC182213	0_1_2	Response to stress/defence	Snakin2 precursor
Les.413.1.S1_s_at	3	TC189521	0_1_2	Response to stress/defence	Glutathione S-transferase
Les.1650.1.A1_at	4	TC188260	0_1_2	Other secondary metabolism	Tropinone reductase
LesAffx.8708.1.S1_at	16	AW033860	0_1_2	Signal transduction	Receptor-like protein kinase
LesAffx.16424.1.S1_s_at	17	TC178062	0_1_2	Signal transduction	Mitogen-activated protein kinase 3
Les.1197.2.A1_at	3	TC178129	0_1_2	Signal transduction	Putative 7-transmembrane G-protein-coupled receptor
Les.3338.1.S1_at	3	TC183169	0_1_2	Signal transduction	S-adenosyl-L-methionine synthetase-like
Les.5571.1.S1_at	17	AJ784436	0_1_2	Transcription factor activity	Ethylene response transcription factor 4
Les.5130.1.S1_at	6	BT013342.1	0_1_2	Transcription factor activity	ABI3 transcription factor
Les.5760.1.S1_at	3	BT014516.1	0_1_2	Transcription factor activity	Plant vascular transcription factor
Les.4139.1.S1_at	9	TC170565	0_1_2	Transcription factor activity	ERF4- AP2 factor
Les.3679.1.S1_at	2	TC174512	0_1_2	Transcription factor activity	Ethylene-responsive transcription factor (ERF1)
LesAffx.4793.1.S1_at	17	TC175616	0_1_2	Transcription factor activity	Putative WRKY transcription
Les.5958.1.S1_at	17	TC179799	0_1_2	Transcription factor activity	Putative CCR4 transcription factor
Les.3379.1.S1_at	8	TC183690	0_1_2	Transcription factor activity	AP2 factor
Les.1708.1.S1_at	3	TC184502	0_2_1	Transcription factor activity	MYC1 (bHLH) transcription factor
Les.5231.1.S1_at	3	BT013536.1	0_1_2	Transporter activity	Aquaporin
Les.73.1.S1_at	4	TC169870	0_1_2	Transporter activity	Phosphate transporter
LesAffx.286.2.S1_a_at	3	TC170408	0_1_2	Transporter activity	Aquaporin
Les.2866.1.A1_at	3	TC172148	0_1_2	Transporter activity	Aquaporin
Les.3973.1.S1_at	4	TC182428	0_1_2	Transporter activity	Sucrose transport protein
Les.28.2.S1_a_at	8	TC186351	0_2_1	Transporter activity	Putative high-affinity nitrate transporter
Les.3166.1.S1_at	3	AI775188	0_1_2	Unknown	Oxidoreductase
LesAffx.14903.1.S1_at	3	AW429117	0_2_1	Unknown	Unknow
Les.4615.1.S1_at	3	BE462687	0_1_2	Unknown	Unknow
LesAffx.1345.1.S1_at	3	BF113815	0_1_2	Unknown	Unknow
Les.1013.1.A1_at	3	BG628758	0_1_2	Unknown	Unknow
LesAffx.58075.1.S1_at	4	BI928092	0_1_2	Unknown	Unknow
Les.4849.1.S1_at	3	BT012755.1	0_1_2	Unknown	Short-chain dehydrogenase
Les.4993.1.S1_at	5	BT013064.1	0_1_2	Unknown	Putative NADH dehydrogenase
Les.5865.1.S1_at	3	BT013275.1	0_1_2	Unknown	Unknow
Les.5523.1.S1_at	17	BT014071.1	0_1_2	Unknown	Unknow
Les.327.1.S1_at	6	BT014378.1	0_1_2	Unknown	Unknow
Les.4223.1.S1_at	7	TC169923	0_1_2	Unknown	Alternative oxidase
Les.3637.1.S1_at	3	TC171279	0_1_2	Unknown	Branched-chain-amino-acid transaminase activity
LesAffx.59056.1.S1_at	15	TC171402	0_1_2	Unknown	Unknow
LesAffx.6294.1.S1_at	20	TC173084	0_3_0	Unknown	Unknow
Les.1077.1.S1_at	20	TC173141	0_1_2	Unknown	Unknow
LesAffx.57454.1.S1_at	4	TC175978	0_1_2	Unknown	Calmodulin binding
LesAffx.26417.1.S1_at	3	TC176376	0_1_2	Unknown	Unknow
LesAffx.26417.2.S1_at	3	TC176376	0_2_1	Unknown	Unknow
LesAffx.15004.1.S1_at	6	TC177005	0_1_2	Unknown	Unknow
Les.180.1.S1_at	20	TC177136	0_3_0	Unknown	Annexin
Les.898.1.A1_at	8	TC177505	0_1_2	Unknown	Unknow
LesAffx.66342.1.S1_at	3	TC177649	0_1_2	Unknown	Unknow
Les.2696.1.S1_at	17	TC177898	0_1_2	Unknown	Unknow
LesAffx.71003.1.S1_at	3	TC178073	0_1_2	Unknown	Unknow
LesAffx.58351.1.S1_at	6	TC178188	0_1_2	Unknown	Unknow
Les.2700.1.S1_at	19	TC180408	0_1_2	Unknown	Putative polyprotein
Les.1832.1.A1_at	3	TC180637	0_1_2	Unknown	Unknow
LesAffx.27006.1.S1_at	3	TC181386	0_1_2	Unknown	Unknow
Les.1672.1.S1_at	3	TC182046	0_1_2	Unknown	Calmodulin-like protein
Les.2164.1.A1_at	3	TC182694	0_1_2	Unknown	Phloem protein
Les.641.1.S1_at	3	TC183873	0_1_2	Unknown	Unknow
LesAffx.3635.2.A1_at	17	TC184538	0_1_2	Unknown	Calmodulin binding
LesAffx.67482.1.S1_at	3	TC186383	0_1_2	Unknown	Unknow
Les.1757.1.A1_at	3	TC191277	0_2_1	Unknown	Oxidoreductase
LesAffx.65757.1.S1_at	4	TC171885	0_2_1	Wax/cutin	Fatty acid elongase-like protein (Cer2-like)
LesAffx.55337.1.S1_at	4	TC172551	0_1_2	Wax/cutin	3-ketoacyl-CoA synthase (KCS)
Les.971.1.A1_at	4	TC173257	0_1_2	Wax/cutin	Very-long-chain fatty acid condensing enzyme (CUT1)
Les.1153.1.S1_at	3	TC182303	0_2_1	Wax/cutin	Glycerol-3-phosphate dehydrogenase

## Sheet: flesh_y_down
Genes upregulated in wild type (wt) flesh vs. the y mutant flesh
ProbeID	Cluster	Identifier (TC)	Summary	pathway	Annotation	Br	Or	Red
LesAffx.53231.1.S1_at	20	TC178310	1_0_2	Carbohydrate metabolism	Beta-amylase
Les.3214.2.S1_at	20	TC180306	1_0_2	Carbohydrate metabolism	NAD-dependent epimerase
LesAffx.44382.1.S1_at	17	TC183886	1_0_2	Carbohydrate metabolism	Putative pectinesterase
Les.3625.1.S1_at	6	TC183891	1_0_2	Carbohydrate metabolism	Putative neutral/alkaline invertase
Les.4334.1.A1_at	2	TC187001	2_0_1	Carbohydrate metabolism	Mannose-binding lectin
Les.1.1.S1_at	6	TC169829	1_0_2	Cell wall	Beta-galactosidase
Les.4449.1.S1_s_at	6	TC169920	1_0_2	Cell wall	Endo-beta-mannanase
LesAffx.71442.2.S1_at	20	TC185914	1_0_2	Cell wall	Polygalcturenase
Les.4839.1.A1_at	6	BT012734.1	1_0_2	DNA metabolism	Histone H1
Les.32.1.S1_at	6	TC169866	1_0_2	DNA metabolism	Cryptochrome 1
Les.2033.1.A1_a_at	18	TC170351	1_0_2	DNA metabolism	H1 histone
Les.5694.1.S1_at	7	BT014398.1	1_0_2	Fatty acid metabolism	Sterol-binding dehydrogenase
Les.3967.1.S1_at	17	TC169929	1_0_2	Fatty acid metabolism	Omega-3 fatty acid desaturase
LesAffx.37344.2.S1_at	2	TC174370	1_0_2	Fatty acid metabolism	Lipase-like protein
Les.2417.1.S1_at	20	TC178841	1_0_2	Hormone metabolism	Aldehyde oxidase
Les.91.1.S1_at	17	TC169881	1_0_2	Isoprenoid metabolism	9-cis-epoxycarotenoid dioxygenase (NCED)
Les.3544.1.S1_at	6	TC170778	1_0_2	Isoprenoid metabolism	Beta-carotene hydroxylase (CRTR-B2)
Les.3228.1.S1_at	11	TC171575	1_0_2	Miscellaneous	Cysteine proteinase
Les.3228.2.S1_a_at	11	TC171575	2_0_1	Miscellaneous	Cysteine proteinase
LesAffx.31022.1.A1_at	2	TC175898	1_0_2	Miscellaneous	Unknown
Les.3266.2.S1_at	17	TC183453	1_0_2	Miscellaneous	Putative acetylornithine deacetylase
LesAffx.23486.1.S1_at	16	TC185777	1_0_2	Miscellaneous	Circadian clock coupling factor ZGT
LesAffx.51348.1.S1_at	16	TC186304	2_0_1	Miscellaneous	Endopeptidase
LesAffx.44580.1.A1_at	19	TC190061	1_0_2	Miscellaneous	Epsin
Les.5842.1.S1_at	2	BT014024.1	1_0_2	Phenylpropanoids/flavonoids	Rhamnosyltransferase (RT)
Les.2278.1.S1_at	16	BT014352.1	2_0_1	Phenylpropanoids/flavonoids	Flavanone 3-hydroxylase (F3H)
Les.3650.1.S1_at	16	TC170658	2_0_1	Phenylpropanoids/flavonoids	Chalcone synthase (CHS1)
LesAffx.15898.1.S1_at	6	TC172281	2_0_1	Phenylpropanoids/flavonoids	UDP-xylose phenolic glycosyltransferase
Les.3085.1.S1_at	16	TC172800	2_0_1	Phenylpropanoids/flavonoids	Flavonol synthase (FLS)
Les.281.3.S1_at	6	TC173154	1_0_2	Phenylpropanoids/flavonoids	4-coumarate CoA ligase (4CL)
Les.2633.1.A1_at	16	TC176277	2_0_1	Phenylpropanoids/flavonoids	Flavonoid 3-glucosyl transferase (3GT)
Les.1968.1.A1_at	16	TC178705	2_0_1	Phenylpropanoids/flavonoids	Chalcone isomerase (CHI)
LesAffx.34276.1.S1_at	16	TC180112	1_0_2	Phenylpropanoids/flavonoids	Cinnamoyl CoA reductase-like (CCR) / weakly similar
Les.4794.1.S1_at	2	BT014116.1	1_0_2	Primary metabolism	NAD-malate dehydrogenase precursor
LesAffx.62009.1.S1_at	6	TC173993	1_0_2	Primary metabolism	Putative phosphofructokinase
Les.4275.1.S1_at	2	TC176756	1_0_2	Primary metabolism	Plastidic aldolase
Les.5627.1.S1_at	17	BT014278.1	1_0_2	Protein metabolism	Putative palmitoyl-protein thioesterase
Les.5648.1.S1_at	16	BT014316.1	1_0_2	Protein metabolism	Cysteine proteinase
Les.2942.1.S1_at	20	TC173657	1_0_2	Protein metabolism	Elongation factor
Les.3311.3.S1_at	16	TC174548	1_0_2	Protein metabolism	Isocitrate dehydrogenase
Les.702.1.S1_at	8	TC175504	1_0_2	Protein metabolism	S-adenosylmethionine decarboxylase (SamDC)
Les.3071.2.S1_at	6	TC177632	1_0_2	Protein metabolism	Lysine-ketoglutarate reductase
Les.3619.1.S1_at	5	TC178155	1_0_2	Protein metabolism	Ethylene-responsive proteinase inhibitor 1 precursor
Les.3299.2.A1_s_at	2	TC185848	1_0_2	Protein metabolism	Arginase 2
LesAffx.1.1.S1_at	2	TC185848	1_0_2	Protein metabolism	Arginase 3
LesAffx.64054.3.S1_at	2	AW037801	1_0_2	Response to stress/defence	Glutathione S-transferase
LesAffx.3568.3.A1_at	10	CK715907	1_0_2	Response to stress/defence	Cold-stress inducible protein
Les.3668.1.S1_at	17	TC170695	1_0_2	Response to stress/defence	Lipoxygenase
Les.2886.1.A1_at	2	TC174345	1_0_2	Response to stress/defence	Flower-specific gamma-thionin-like protein
LesAffx.66253.1.S1_at	19	TC177496	1_0_2	Response to stress/defence	NL0D protein
Les.2012.1.S1_at	2	TC180465	1_0_2	Response to stress/defence	Inositol-3-phosphate synthase (IPS)
LesAffx.69215.1.S1_at	17	TC181576	1_0_2	Response to stress/defence	Polygalacturonase inhibitor-like protein
Les.2668.1.S1_at	6	TC183059	1_0_2	Response to stress/defence	Auxin and ethylene responsive GH3-like protein
LesAffx.8748.1.A1_at	6	TC183521	1_0_2	Response to stress/defence	Putative acid phosphatase type 5
Les.1645.1.A1_at	18	TC185053	1_0_2	Response to stress/defence	Glutathione S-transferase
Les.827.1.S1_at	20	TC185742	1_0_2	Response to stress/defence	GAST1 protein precursor (gibberellin-regulated protein)
LesAffx.47142.1.S1_at	6	TC187410	1_0_2	Response to stress/defence	Glutathione S-transferase
Les.4929.1.S1_at	2	BT012922.1	1_0_2	Transcription factor activity	Homeobox protein
Les.5130.1.S1_at	6	BT013342.1	1_0_2	Transcription factor activity	ABI3 transcription factor
Les.3065.2.A1_at	2	TC173627	1_0_2	Transcription factor activity	Squamosa promoter-binding protein transcription factor
Les.3679.1.S1_at	4	TC174512	1_0_2	Transcription factor activity	Ethylene-responsive transcription factor (ERF1)
LesAffx.37115.1.S1_at	16	TC178581	2_0_1	Transcription factor activity	MADS-box transcription factor
Les.349.1.S1_at	1	TC181747	1_0_2	Transcription factor activity	Transcription factor
Les.46.1.S1_at	6	X60760.1	1_0_2	Transcription factor activity	MADS-box transcription factor (TDR8)
LesAffx.29850.1.S1_at	2	AI896828	1_0_2	Transporter activity	Putative mitochondrial dicarboxylate carrier protein
LesAffx.65020.2.S1_at	2	BF113999	1_0_2	Transporter activity	Uncoupling protein
Les.4073.1.S1_at	7	TC176558	1_0_2	Transporter activity	Amino acid transporter (LeAAP2)
Les.3973.1.S1_at	16	TC182428	1_0_2	Transporter activity	Sucrose transport protein
LesAffx.16710.2.S1_at	10	TC184589	1_0_2	Transporter activity	Aquaporin
LesAffx.67592.1.S1_at	16	TC185248	1_0_2	Transporter activity	Nonspecific lipid-transfer protein
LesAffx.23347.1.S1_at	16	AI776728	1_0_2	Unknown	Unknow
Les.5146.1.S1_at	2	BT013382.1	1_0_2	Unknown	Unknow
Les.5191.1.S1_at	20	BT013476.1	1_0_2	Unknown	Formate-tetrahydrofolate ligase
Les.5198.1.S1_at	6	BT013491.1	2_0_1	Unknown	Unknow
Les.3591.1.S1_at	11	TC171069	3_0_0	Unknown	Unknow
LesAffx.13365.1.S1_at	6	TC171094	2_0_1	Unknown	Unknow
Les.220.1.S1_at	17	TC171127	1_0_2	Unknown	Transferase
Les.3403.2.S1_at	2	TC171978	1_0_2	Unknown	Phosphatase
Les.4021.1.A1_at	2	TC172043	1_0_2	Unknown	Unknow
Les.275.3.S1_at	6	TC172045	1_0_2	Unknown	Cytochrome P450 (CYP71 familly)
LesAffx.56797.1.S1_at	17	TC172126	1_0_2	Unknown	Nodulin like protein
LesAffx.37595.1.S1_at	8	TC172871	1_0_2	Unknown	Unknow
Les.3040.1.S1_at	6	TC173001	2_0_1	Unknown	Unknow
Les.2414.1.S1_at	2	TC173114	1_0_2	Unknown	Unknow
LesAffx.3704.1.S1_at	6	TC173152	1_0_2	Unknown	Unknow
Les.2523.1.A1_at	10	TC174750	1_0_2	Unknown	Glycosyl transferase
LesAffx.17303.1.S1_at	6	TC176841	1_0_2	Unknown	Unknow
LesAffx.35593.1.S1_at	6	TC177287	1_0_2	Unknown	Unknow
LesAffx.68306.1.S1_at	6	TC177581	1_0_2	Unknown	Unknow
LesAffx.58351.1.S1_at	6	TC178188	1_0_2	Unknown	Unknow
LesAffx.25133.1.S1_at	17	TC178504	1_0_2	Unknown	Unknow
LesAffx.18067.1.S1_at	2	TC178522	1_0_2	Unknown	Unknow
Les.2268.1.A1_at	16	TC178916	1_0_2	Unknown	Putative glycine-rich RNA binding protein
LesAffx.56104.1.S1_at	6	TC179616	1_0_2	Unknown	RING-H2 finger protein
LesAffx.30198.1.S1_at	2	TC179700	1_0_2	Unknown	Unknow
LesAffx.58502.1.S1_at	6	TC180042	1_0_2	Unknown	Hydrolase
Les.275.2.S1_at	6	TC182097	1_0_2	Unknown	Ribosomal DNA
Les.4334.2.S1_at	2	TC182426	2_0_1	Unknown	Unknow
Les.4397.1.S1_at	2	TC184331	1_0_2	Unknown	Unknow
LesAffx.17663.2.A1_at	18	TC184992	1_0_2	Unknown	Unknow
LesAffx.56070.1.S1_at	6	TC185186	2_0_1	Unknown	Unknow
LesAffx.56389.1.S1_at	16	TC186031	1_0_2	Unknown	Aldo/keto reductase
Les.672.1.S1_at	6	TC187056	1_0_2	Unknown	Cytochrome P450 (CYP96A5)
Les.4045.1.S1_at	6	TC188035	1_0_2	Unknown	Unknow
Les.4034.1.A1_at	6	TC189976	1_0_2	Unknown	Ripening regulated protein (DDTFR20)
Les.4034.1.S1_at	6	TC189976	2_0_1	Unknown	Ripening regulated protein(DDTFR20)

## Sheet: flesh_y_up
Genes upregulated in y flesh vs. wild type (wt) flesh
ProbeID	Cluster	Identifier (TC)	Summary	pathway	Annotation	Br	Or	Red
Les.2069.1.A1_at	14	TC174120	0_1_2	Carbohydrate metabolism	Inositol monophosphatase 3
LesAffx.10299.1.S1_at	15	TC181693	0_1_2	Carbohydrate metabolism	Putative sorbitol transporter
Les.4520.1.S1_at	2	BT013422.1	0_1_2	Cell wall	Phytochelatin synthetase-like protein
Les.564.1.S1_at	2	BT013449.1	0_1_2	Cell wall	Endo-1 4-beta-glucanase
Les.263.1.S1_at	2	TC169876	0_1_2	Cell wall	Polygalacturonase
Les.3537.1.S1_at	5	TC174516	0_1_2	Cell wall	Endoxyloglucan transferase (EXGT-A3)
Les.5167.1.S1_at	5	BT013420.1	0_1_2	DNA metabolism	Regulator of chromosome condensation-like protein
Les.5680.1.S1_at	2	BT014376.1	0_1_2	DNA metabolism	ATP-dependent RNA helicase
Les.4725.1.S1_at	5	BT014453.1	0_1_2	DNA metabolism	Histone methyltransferase
Les.5955.1.S1_at	12	TC177159	0_1_2	DNA metabolism	Centromere protein (CENP-C)
Les.4539.1.S1_a_at	2	TC179710	0_1_2	DNA metabolism	Histone H4
Les.3493.1.S1_at	9	TC170104	0_1_2	Fatty acid metabolism	Phospholipase
Les.3980.1.S1_at	6	TC170594	0_1_2	Fatty acid metabolism	Lipoxygenase
Les.192.1.A1_at	2	AI780448	0_1_2	Hormone metabolism	Drm3-like protein
LesAffx.1861.4.S1_at	2	TC172010	0_1_2	Hormone metabolism	1-aminocyclopropane-1-carboxylate oxidase activity
LesAffx.67147.1.S1_at	2	TC183769	0_1_2	Isoprenoid metabolism	IPP isomerase
Les.4083.1.S1_at	2	TC173972	0_1_2	Photosynthesis	Chlorophyll a-b binding protein 7 chloroplast precursor
Les.2620.2.S1_at	2	TC175602	0_1_2	Photosynthesis	Photosystem II reaction center
Les.4228.3.S1_at	2	TC176585	0_1_2	Photosynthesis	Photosystem I reaction center
Les.1472.1.S1_at	2	TC187403	0_1_2	Photosynthesis	Photosystem II oxygen-evolving
Les.2701.1.A1_at	2	TC176622	0_1_2	Primary metabolism	Tyrosine aminotransferase
LesAffx.18735.1.S1_at	12	BI922952	0_1_2	Protein metabolism	Chloroplast 30S ribosomal protein S3
Les.4803.1.S1_at	9	BT013418.1	0_1_2	Protein metabolism	Proline oxidase/dehydrogenase
LesAffx.29104.1.S1_at	2	TC175844	0_1_2	Protein metabolism	Ribosomal protein L3B
LesAffx.66215.1.S1_at	15	TC183701	0_1_2	Protein metabolism	Nucellin-like protein
Les.4855.1.S1_at	2	BT012770.1	0_1_2	Response to stress/defence	Hypersensitive-induced response protein
Les.5654.1.S1_at	8	BT014325.1	0_1_2	Response to stress/defence	RING-H2 subgroup RHE protein
Les.167.1.S1_at	3	TC169955	0_1_2	Response to stress/defence	Superoxide dismutase
LesAffx.43379.1.S1_at	2	TC170960	0_1_2	Response to stress/defence	STS14 protein precursor
Les.123.1.S1_at	12	TC171342	0_1_2	Response to stress/defence	Glutathione S-transferase
LesAffx.3163.1.S1_at	8	TC172334	0_1_2	Response to stress/defence	Zinc finger A20 and AN1 domain
Les.253.1.S1_at	2	TC177645	0_1_2	Response to stress/defence	Dehydration-induced protein (RD22)
Les.3160.2.S1_at	9	TC179427	0_1_2	Response to stress/defence	Heat shock protein
LesAffx.69210.1.S1_at	14	TC179987	0_1_2	Response to stress/defence	Cysteine proteinase inhibitor
Les.3034.1.S1_at	2	TC180501	0_1_2	Response to stress/defence	Proteinase inhibitor precursor
Les.5939.1.S1_at	8	TC180524	0_1_2	Response to stress/defence	Avr9/Cf-9 rapidly elicited protein
Les.5322.1.S1_at	9	BT013710.1	0_1_2	Signal transduction	Protein kinase
LesAffx.17130.1.S1_at	5	CK715835	0_1_2	Signal transduction	Unknown
Les.738.1.S1_at	2	TC171005	0_1_2	Signal transduction	Serine/threonine protein kinase
Les.3334.2.S1_at	1	TC178546	0_1_2	Signal transduction	Protein kinase CPK1
Les.2027.3.S1_at	8	TC182800	0_1_2	Signal transduction	Protein kinase
Les.3338.1.S1_a_at	2	TC183169	0_1_2	Signal transduction	S-adenosyl-L-methionine synthetase-like
LesAffx.44071.1.S1_at	8	TC183296	0_1_2	Signal transduction	Similar to axi 1 protein
Les.2063.1.A1_at	5	TC190825	0_1_2	Signal transduction	Photoregulatory zinc-finger protein COP1
Les.4139.1.S1_at	4	TC170565	0_1_2	Transcription factor activity	ERF4- AP2 factor
LesAffx.54522.1.S1_at	13	TC171391	0_1_2	Transcription factor activity	MYB transcription factor
Les.1864.1.S1_at	2	TC177189	0_1_2	Transcription factor activity	BHLH transcription factor
Les.3984.1.S1_at	2	TC179486	0_1_2	Transcription factor activity	Dehydration responsive element binding protein
LesAffx.3606.1.S1_at	8	TC180148	0_2_1	Transcription factor activity	MYB transcription factor
Les.1708.1.S1_at	2	TC184502	0_1_2	Transcription factor activity	MYC1 (bHLH) transcription factor
Les.452.1.S1_at	2	BT013080.1	0_1_2	Transporter activity	ABC transporter
Les.177.1.S1_at	9	TC170301	0_1_2	Transporter activity	Putative sugar transporter
Les.119.1.S1_at	12	TC171321	0_1_2	Transporter activity	Putative aquaporin
LesAffx.47116.1.S1_at	9	TC180780	0_1_2	Transporter activity	Lysosomal Cystine Transporter
LesAffx.56589.1.S1_at	5	AW036515	0_2_1	Unknown	Unknow
LesAffx.16111.1.S1_at	2	BE441170	0_1_2	Unknown	Unknow
LesAffx.1345.1.S1_at	9	BF113815	0_1_2	Unknown	Unknow
Les.1718.1.A1_at	5	BG628334	0_1_2	Unknown	Unknow
Les.1787.1.A1_at	12	BG628780	0_1_2	Unknown	Unknow
LesAffx.58075.1.S1_at	5	BI928092	0_1_2	Unknown	Unknow
Les.5251.1.S1_at	5	BT013566.1	0_1_2	Unknown	Calcium ion binding
Les.2501.1.S1_at	18	BT013655.1	0_1_2	Unknown	Unknow
Les.5522.1.S1_at	2	BT014069.1	0_2_1	Unknown	Unknow
Les.5683.1.S1_at	9	BT014382.1	0_1_2	Unknown	Disulfide oxidoreductase
Les.5927.1.S1_at	8	CK715580	0_1_2	Unknown	Unknow
LesAffx.10301.1.A1_at	12	CK715878	0_1_2	Unknown	Unknow
Les.2572.2.S1_a_at	1	TC170011	0_1_2	Unknown	Unknow
LesAffx.64990.1.S1_at	9	TC170136	0_1_2	Unknown	Unknow
LesAffx.44395.1.S1_at	12	TC172077	0_1_2	Unknown	Unknow
LesAffx.16884.1.S1_at	9	TC173021	0_1_2	Unknown	Putative ripening-related hydrolase
LesAffx.6294.1.S1_at	2	TC173084	0_2_1	Unknown	Unknow
Les.1699.2.S1_at	2	TC173239	0_1_2	Unknown	Unknow
LesAffx.68776.1.S1_at	15	TC173311	0_1_2	Unknown	Unknow
LesAffx.56638.1.S1_at	5	TC174274	0_1_2	Unknown	Unknow
Les.2409.1.S1_at	2	TC175021	0_1_2	Unknown	Unknow
LesAffx.60109.1.S1_at	2	TC176414	0_1_2	Unknown	Unknow
Les.3019.2.S1_at	2	TC176891	0_1_2	Unknown	Short-chain dehydrogenase
LesAffx.15004.1.S1_at	5	TC177005	0_1_2	Unknown	Unknow
Les.180.1.S1_at	14	TC177136	0_3_0	Unknown	Annexin
Les.1699.1.A1_at	2	TC177909	0_1_2	Unknown	Unknow
LesAffx.70732.1.S1_at	9	TC177948	0_2_1	Unknown	Unknow
LesAffx.49298.1.S1_at	9	TC178596	0_1_2	Unknown	Carbonate dehydratase - like protein
Les.1672.1.S1_at	2	TC182046	0_1_2	Unknown	Calmodulin-like protein
Les.557.1.S1_at	2	TC182878	0_1_2	Unknown	Calmodulin-like protein
Les.375.1.A1_at	2	TC183935	0_1_2	Unknown	Unknow
LesAffx.5435.1.S1_at	5	TC184079	0_1_2	Unknown	Cytochrome P450 (CYP4 familly)
LesAffx.53966.1.S1_at	2	TC184370	0_1_2	Unknown	Glycine-rich protein (LeGRP1)
LesAffx.34973.1.S1_at	15	TC185130	0_2_1	Unknown	Putative acetyltransferase
LesAffx.10113.1.A1_at	8	TC185161	0_1_2	Unknown	Unknow
Les.1455.1.S1_at	9	TC185286	0_1_2	Unknown	Hydrolase
Les.2264.1.S1_at	6	TC185537	0_1_2	Unknown	Unknow
Les.4727.1.S1_at	15	TC186201	0_2_1	Unknown	Oxidoreductase
LesAffx.69601.2.S1_at	2	TC188373	0_1_2	Unknown	Putative PAP-specific phosphatase
Les.4495.1.S1_at	5	TC189735	0_1_2	Unknown	Hydrolase
Les.1744.1.S1_at	2	TC191075	0_1_2	Unknown	RNA recognition motif containing protein
LesAffx.55337.1.S1_at	17	TC172551	0_1_2	Wax/cutin	3-ketoacyl-CoA synthase (KCS)
Les.971.1.A1_at	17	TC173257	0_1_2	Wax/cutin	Very-long-chain fatty acid condensing enzyme (CUT1)

## Sheet: peel_y_wt_up
Genes upregulated in y and wild type (wt) peel
ProbeID	Cluster	Identifier (TC)	Summary	pathway	Annotation	Br	Or	Red
Les.192.2.S1_at	3	TC174442	1_1_1	DNA metabolism	Putative auxin-repressed protein
Les.3073.1.S1_at	15	TC170129	1_1_1	Photosynthesis	Photosystem II 22 kDa protein chloroplast precursor
Les.3358.1.S1_a_at	3	TC180850	1_1_1	Primary metabolism	Arginine decarboxylase
Les.3550.1.S1_at	6	TC169981	1_1_1	Response to stress/defence	Heat shock protein (Hsc70)
LesAffx.69957.1.S1_at	6	TC173955	1_1_1	Response to stress/defence	Heat shock protein
LesAffx.56301.1.S1_at	2	TC177892	1_1_1	Response to stress/defence	TMV-induced protein I
Les.3160.1.S1_at	3	TC179427	1_1_1	Response to stress/defence	Heat shock protein
Les.4150.1.S1_at	6	TC187014	1_1_1	Response to stress/defence	Mitochondrial small heat shock protein
Les.2027.3.S1_at	12	TC182800	1_1_1	Signal transduction	Protein kinase
Les.5699.1.S1_at	12	BT014403.1	1_1_1	Transcription factor activity	NAC transcription factor
Les.3774.1.S1_at	3	TC169872	1_2_0	Transporter activity	Hexose transporter
LesAffx.12670.3.S1_at	5	TC178428	1_1_1	Transporter activity	Carbohydrate transporter
LesAffx.64990.1.S1_at	3	TC170136	1_1_1	Unknown	Unknow

## Sheet: flesh_y_wt_down
Genes upregulated in the y mutant and wild type (wt) flesh tissue
ProbeID	Cluster	Identifier (TC)	Summary	pathway	Annotation	Br	Or	Red
Les.276.1.S1_at	8	TC188444	1_1_1	Carbohydrate metabolism	Xyloglucan endotransglycosylase precursor
Les.192.2.S1_at	2	TC174442	1_1_1	DNA metabolism	Putative auxin-repressed protein
Les.4496.1.S1_at	2	TC170338	2_1_0	Response to stress/defence	Pathogenesis-related protein
LesAffx.62593.1.S1_at	8	TC175056	1_2_0	Response to stress/defence	Avr9/Cf-9 rapidly elicited protein
Les.2832.1.S1_at	8	TC189383	1_1_1	Response to stress/defence	Peroxidase precursor
LesAffx.4793.1.S1_at	8	TC175616	1_1_1	Transcription factor activity	Putative WRKY transcription
Les.5958.1.S1_at	8	TC179799	1_1_1	Transcription factor activity	Putative CCR4 transcription factor
LesAffx.64583.1.S1_at	8	TC179801	1_1_1	Transporter activity	Antiporter activity
LesAffx.3630.1.S1_at	6	TC180065	1_1_1	Unknown	Unknow

## Sheet: summ 1
ProbeID	Cluster		Identifier (TC)	Summary		Pathway	Annotation	Peel			Flesh
	Peel	Flesh		Peel	Flesh			Br	Or	Red	Br	Or	Red
LesAffx.53231.1.S1_at		20	TC178310		1_0_2	Carbohydrate metabolism	Beta-amylase							y flesh down
LesAffx.44382.1.S1_at		17	TC183886		1_0_2	Carbohydrate metabolism	Putative pectinesterase							y flesh down
Les.4334.1.A1_at		2	TC187001		2_0_1	Carbohydrate metabolism	Mannose-binding lectin							y flesh down
Les.3214.2.S1_at		20	TC180306		1_0_2	Carbohydrate metabolism	NAD-dependent epimerase							y flesh down
Les.3625.1.S1_at	6	6	TC183891	2_0_1	1_0_2	Carbohydrate metabolism	Putative neutral/alkaline invertase							y peel down and y flesh down
Les.68.2.S1_a_at	11		BT013727.1	2_0_1		Carbohydrate metabolism	Endo-beta-1-4-D-glucanase							y peel down
LesAffx.49263.1.S1_at	6		AW220355	1_0_2		Carbohydrate metabolism	Xylose synthase							y peel down
Les.2187.1.A1_at	17		TC185081	1_0_2		Carbohydrate metabolism	Beta-mannan endohydrolase							y peel down
Les.4697.1.S1_at	5		BT013659.1	1_0_2		Carbohydrate metabolism	Putative DNA/RNA binding protein (pcp1)							y peel down
Les.3461.1.S1_at	14		TC169884	1_0_2		Carbohydrate metabolism	Cell-wall invertase							y peel down
Les.276.1.S1_at	4	8	TC188444	0_1_2	1_1_1	Carbohydrate metabolism	Xyloglucan endotransglycosylase precursor							y peel up and y wt flesh up
Les.2069.1.A1_at		14	TC174120		0_1_2	Carbohydrate metabolism	Inositol monophosphatase 3							y flesh up
LesAffx.10299.1.S1_at	4	15	TC181693	0_2_1	0_1_2	Carbohydrate metabolism	Putative sorbitol transporter							y peel up and y flesh up
Les.4583.1.S1_at	3		BT012697.1	0_1_2		Carbohydrate metabolism	Nucleotide sugar epimerase-like protein							y peel up
Les.5081.1.S1_at	3		BT013237.1	0_2_1		Carbohydrate metabolism	Beta-D-glucan exohydrolase-like protein							y peel up
Les.5131.1.S1_at	3		BT013344.1	0_1_2		Carbohydrate metabolism	Isoamylase							y peel up
Les.3187.1.S1_at	3		BT013477.1	0_1_2		Carbohydrate metabolism	Glycolate oxidase							y peel up
Les.204.1.S1_at	3		TC188019	0_1_2		Carbohydrate metabolism	ADP-glucose pyrophosphorylase small subunit							y peel up
Les.3669.1.S1_at	17		TC169844	0_1_2		Carbohydrate metabolism	Sucrose synthase							y peel up
Les.3697.1.S1_at	4		TC170058	0_1_2		Carbohydrate metabolism	xyloglucan endotransglycosylase (LeXET2)							y peel up
Les.2844.2.A1_at	6		TC182123	0_1_2		Carbohydrate metabolism	Beta-amylase							y peel up
Les.5374.1.S1_at	5		BT013799.1	0_1_2		Carbohydrate metabolism	Sugar transporter							y peel up
Les.1.1.S1_at		6	TC169829		1_0_2	Cell wall	Beta-galactosidase							y flesh down
LesAffx.71442.2.S1_at		20	TC185914		1_0_2	Cell wall	Polygalcturenase							y flesh down
Les.4449.1.S1_s_at	6	6	TC169920	0_1_2	1_0_2	Cell wall	Endo-beta-mannanase							y flesh down and y peel up
LesAffx.846.2.S1_at	3		CK715974	0_1_2		Cell wall	Pectinacetylesterase precursor							y peel up
Les.3483.1.S1_at	3		TC169863	0_1_2		Cell wall	Arabinosidase ARA-1							y peel up
Les.369.1.S1_at	3		TC171915	0_2_1		Cell wall	Expansin precursor							y peel up
Les.4520.1.S1_at		2	BT013422.1		0_1_2	Cell wall	Phytochelatin synthetase-like protein							y flesh up
Les.564.1.S1_at		2	BT013449.1		0_1_2	Cell wall	Endo-1 4-beta-glucanase							y flesh up
Les.263.1.S1_at		2	TC169876		0_1_2	Cell wall	Polygalacturonase							y flesh up
Les.3537.1.S1_at		5	TC174516		0_1_2	Cell wall	Endoxyloglucan transferase (EXGT-A3)							y flesh up
Les.2033.1.A1_a_at		18	TC170351		1_0_2	DNA metabolism	H1 histone							y flesh down
Les.4839.1.A1_at		6	BT012734.1		1_0_2	DNA metabolism	Histone H1							y flesh down
Les.32.1.S1_at		6	TC169866		1_0_2	DNA metabolism	Cryptochrome 1							y flesh down
LesAffx.70712.1.S1_at	17		TC170828	1_0_2		DNA metabolism	Histone H1-1							y peel down
LesAffx.17178.1.A1_at	2		TC188722	1_0_2		DNA metabolism	Histone-lysine N-methyltransferase							y peel down
Les.192.2.S1_at	3	2	TC174442	1_1_1	1_1_1	DNA metabolism	Putative auxin-repressed protein							y wt peel up and y wt flesh up
Les.5167.1.S1_at		5	BT013420.1		0_1_2	DNA metabolism	Regulator of chromosome condensation-like protein							y flesh up
Les.5680.1.S1_at		2	BT014376.1		0_1_2	DNA metabolism	ATP-dependent RNA helicase							y flesh up
Les.4725.1.S1_at		5	BT014453.1		0_1_2	DNA metabolism	Histone methyltransferase							y flesh up
Les.5955.1.S1_at		12	TC177159		0_1_2	DNA metabolism	Centromere protein (CENP-C)							y flesh up
Les.4539.1.S1_a_at		2	TC179710		0_1_2	DNA metabolism	Histone H4							y flesh up
Les.1287.1.A1_at	6		TC179140	0_1_2		DNA metabolism	H2A histone							y peel up
Les.4439.1.S1_at	3		TC175333	0_1_2		DNA metabolism	H3 histone							y peel up
Les.3209.1.S1_at	3		TC177102	0_1_2		DNA metabolism	H4 histone							y peel up
Les.5694.1.S1_at		7	BT014398.1		1_0_2	Fatty acid metabolism	Sterol-binding dehydrogenase							y flesh down
Les.3967.1.S1_at		17	TC169929		1_0_2	Fatty acid metabolism	Omega-3 fatty acid desaturase							y flesh down
LesAffx.37344.2.S1_at		2	TC174370		1_0_2	Fatty acid metabolism	Lipase-like protein							y flesh down
LesAffx.45975.1.S1_at	14		BI209975	3_0_0		Fatty acid metabolism	Lipase							y peel down
Les.1977.2.S1_at	17		TC173058	1_0_2		Fatty acid metabolism	Acyltransferase							y peel down
Les.5879.1.S1_at	13		TC174273	2_0_1		Fatty acid metabolism	Alpha-dioxygenase 2							y peel down
LesAffx.69088.1.S1_at	13		TC174706	1_0_2		Fatty acid metabolism	3-hydroxyisobutyryl-coenzyme A hydrolase							y peel down
LesAffx.9764.1.S1_at	14		TC176438	1_0_2		Fatty acid metabolism	Cytochrome b5							y peel down
Les.3493.1.S1_at		9	TC170104		0_1_2	Fatty acid metabolism	Phospholipase							y flesh up
Les.3980.1.S1_at		6	TC170594		0_1_2	Fatty acid metabolism	Lipoxygenase							y flesh up
LesAffx.36049.1.S1_at	3		AW039066	0_3_0		Fatty acid metabolism	Lipase (EXL1)							y peel up
Les.4906.1.S1_at	3		BT012874.1	0_2_1		Fatty acid metabolism	Lipase (EXL2)							y peel up
Les.4187.1.S1_at	3		TC171195	0_1_2		Fatty acid metabolism	Non-specific lipid transfer protein							y peel up
Les.507.1.S1_at	3		TC171480	0_1_2		Fatty acid metabolism	Enoyl-ACP reductase							y peel up
Les.4467.1.S1_at	3		TC172218	0_1_2		Fatty acid metabolism	Lipid transfer protein							y peel up
Les.2038.1.A1_at	3		TC180145	0_1_2		Fatty acid metabolism	GDSL-motif lipase/hydrolase							y peel up
LesAffx.65821.1.S1_at	4		TC180384	0_2_1		Fatty acid metabolism	Esterase/lipase/thioesterase							y peel up
Les.1058.1.S1_at	3		TC183551	0_1_2		Fatty acid metabolism	Squalene monooxygenase							y peel up
Les.2417.1.S1_at		20	TC178841		1_0_2	Hormone metabolism	Aldehyde oxidase							y flesh down
Les.3225.3.S1_at	4		TC170230	1_0_2		Hormone metabolism	1-aminocyclopropane-1-carboxylate oxidase (ACO)							y peel down
Les.221.1.S1_at	14		TC170161	1_0_2		Hormone metabolism	1-aminocyclopropane-1-carboxylate oxidase (ACO)							y peel down
Les.2474.2.A1_at	17		TC186460	1_0_2		Hormone metabolism	DWARF1/DIMINUTO							y peel down
Les.5930.1.S1_at	3		CK716170	0_1_2		Hormone metabolism	Putative short-chain type alcohol dehydrogenase							y peel up
Les.5.1.S1_a_at	3		TC170673	0_1_2		Hormone metabolism	Allene oxide synthase							y peel up
Les.192.1.A1_at	2	3	AI780448	0_1_2	0_1_2	Hormone metabolism	Drm3-like protein							y peel up and y flesh up
LesAffx.1861.4.S1_at	3	2	TC172010	0_1_2	0_1_2	Hormone metabolism	1-aminocyclopropane-1-carboxylate oxidase activity							y peel up and y flesh up
Les.91.1.S1_at	13	17	TC169881	1_0_2	1_0_2	Isoprenoid metabolism	9-cis-epoxycarotenoid dioxygenase (NCED)							y peel down and y flesh down
Les.3544.1.S1_at	6	6	TC170778	1_0_2	1_0_2	Isoprenoid metabolism	Beta-carotene hydroxylase (CRTR-B2)							y peel up and y flesh down
Les.4277.2.S1_at	17		TC177327	1_0_2		Isoprenoid metabolism	S-adenosyl-methionine-sterol-C-methyltransferase							y peel down
Les.4277.1.A1_at	17		TC181125	1_0_2		Isoprenoid metabolism	S-adenosyl-methionine-sterol-C-methyltransferase							y peel down
Les.3113.1.S1_at	14		TC186636	3_0_0		Isoprenoid metabolism	C-4 sterol methyl oxidase (SMO)							y peel down
Les.63.1.S1_at	6		TC175838	1_0_2		Isoprenoid metabolism	Gibberellin 20-oxidase-3							y peel down
LesAffx.67147.1.S1_at		2	TC183769		0_1_2	Isoprenoid metabolism	IPP isomerase							y flesh up
Les.3958.1.S1_at	20		TC177173	0_1_2		Isoprenoid metabolism	Violaxanthin de-epoxidase (VDE)							y peel up
Les.3228.1.S1_at		11	TC171575		1_0_2	Miscellaneous	Cysteine proteinase							y flesh down
Les.3228.2.S1_a_at		11	TC171575		2_0_1	Miscellaneous	Cysteine proteinase							y flesh down
LesAffx.31022.1.A1_at		2	TC175898		1_0_2	Miscellaneous	Unknown							y flesh down
Les.3266.2.S1_at		17	TC183453		1_0_2	Miscellaneous	Putative acetylornithine deacetylase							y flesh down
LesAffx.23486.1.S1_at		16	TC185777		1_0_2	Miscellaneous	Circadian clock coupling factor ZGT							y flesh down
LesAffx.51348.1.S1_at		16	TC186304		2_0_1	Miscellaneous	Endopeptidase							y flesh down
Les.4703.1.S1_at	3		BT012803.1	1_0_2		Miscellaneous	Tubulin beta-1 chain							y peel down
Les.3743.1.S1_at	13		TC169968	1_0_2		Miscellaneous	Acid phosphatase 1 precursor							y peel down
Les.3555.1.S1_at	17		TC170195	1_0_2		Miscellaneous	Lethal leaf spot 1-like protein							y peel down
Les.4011.3.S1_at	11		TC181696	1_0_2		Miscellaneous	Glutamyl-tRNA reductase 1							y peel down
Les.450.1.S1_at	6		TC181810	1_0_2		Miscellaneous	P27KIP1-related-protein 2							y peel down
LesAffx.68547.1.S1_at	14		TC188803	2_0_1		Miscellaneous	Arsenate reductase							y peel down
LesAffx.44580.1.A1_at	11	19	TC190061	1_0_2	1_0_2	Miscellaneous	Epsin							y peel down and y flesh down
Les.790.1.A1_at	6		TC179656	0_1_2		Miscellaneous	Ferric reductase							y peel up
Les.1997.1.S1_at	3		TC187785	0_1_2		Miscellaneous	CALRETICULIN 3 (CTR3) calcium ion binding							y peel up
Les.5842.1.S1_at		2	BT014024.1		1_0_2	Phenylpropanoids/flavonoids	Rhamnosyltransferase (RT)							y flesh down
Les.2278.1.S1_at		16	BT014352.1		2_0_1	Phenylpropanoids/flavonoids	Flavanone 3-hydroxylase (F3H)							y flesh down
Les.281.3.S1_at		6	TC173154		1_0_2	Phenylpropanoids/flavonoids	4-coumarate CoA ligase (4CL)							y flesh down
Les.5706.1.S1_at	13		BT014421.1	2_0_1		Phenylpropanoids/flavonoids	Isoflavone reductase							y peel down
LesAffx.44563.1.A1_at	13		CK715539	1_0_2		Phenylpropanoids/flavonoids	Chorismate mutase/chloroplast precursor (CM1)							y peel down
Les.4271.2.S1_at	14		TC170429	3_0_0		Phenylpropanoids/flavonoids	Phenylalanine ammonia-lyase (PAL)							y peel down
Les.4979.1.S1_at	13		TC170723	1_0_2		Phenylpropanoids/flavonoids	Cinnamoyl CoA reductase (CCR)							y peel down
LesAffx.66380.1.S1_at	6		TC171536	1_0_2		Phenylpropanoids/flavonoids	Glucosyltransferase (GT)							y peel down
LesAffx.10955.1.S1_at	14		TC172766	1_0_2		Phenylpropanoids/flavonoids	Prephenate dehydratase (PDH)							y peel down
LesAffx.10955.3.S1_at	14		TC172766	2_0_1		Phenylpropanoids/flavonoids	Prephenate dehydratase (PDH)							y peel down
Les.4271.1.S1_at	14		TC172772	2_0_1		Phenylpropanoids/flavonoids	Phenylalanine ammonia-lyase (PAL)							y peel down
Les.5848.1.A1_at / Les.5848.2.S1_at	14		TC173193	2_0_1		Phenylpropanoids/flavonoids	4-coumarate CoA ligase (4CL)							y peel down
LesAffx.63776.1.S1_at	14		TC176549	3_0_0		Phenylpropanoids/flavonoids	Flavonoid 3-glucosyl transferase (3GT)							y peel down
LesAffx.31836.1.S1_at	6		TC178150	2_0_1		Phenylpropanoids/flavonoids	Cinnamoyl CoA reductase-like (CCR)							y peel down
Les.5842.1.S1_at	14		TC179039	3_0_0		Phenylpropanoids/flavonoids	Rhamnosyltransferase (RT)							y peel down
Les.2278.1.S1_at	14		TC180957	3_0_0		Phenylpropanoids/flavonoids	Flavanone 3-hydroxylase (F3H)							y peel down
LesAffx.51045.1.S1_at	14		TC181932	1_0_2		Phenylpropanoids/flavonoids	Isoflavone reductase							y peel down
LesAffx.63984.1.S1_at	13		TC183733	2_0_1		Phenylpropanoids/flavonoids	P-coumaroyl 3'-hydroxylase (C3H)							y peel down
Les.842.1.S1_at	3		TC187284	1_0_2		Phenylpropanoids/flavonoids	Arbutin synthase							y peel down
Les.3650.1.S1_at	14	16	TC170658	3_0_0	2_0_1	Phenylpropanoids/flavonoids	Chalcone synthase (CHS1)							y peel down and y flesh down
LesAffx.15898.1.S1_at	6	6	TC172281	1_0_2	2_0_1	Phenylpropanoids/flavonoids	UDP-xylose phenolic glycosyltransferase							y peel down and y flesh down
Les.3085.1.S1_at	14	16	TC172800	2_0_1	2_0_1	Phenylpropanoids/flavonoids	Flavonol synthase (FLS)							y peel down and y flesh down
Les.2633.1.A1_at	14	16	TC176277	3_0_0	2_0_1	Phenylpropanoids/flavonoids	Flavonoid 3-glucosyl transferase (3GT)							y peel down and y flesh down
Les.1968.1.A1_at	14	16	TC178705	3_0_0	2_0_1	Phenylpropanoids/flavonoids	Chalcone isomerase (CHI)							y peel down and y flesh down
LesAffx.34276.1.S1_at	14	16	TC180112	3_0_0	1_0_2	Phenylpropanoids/flavonoids	Cinnamoyl CoA reductase-like (CCR) / weakly similar							y peel down and y flesh down
Les.4798.1.S1_at	3		BT013872.1	0_1_2		Phenylpropanoids/flavonoids	Phenylacetaldehyde reductase (PAR2)							y peel up
LesAffx.344.6.S1_at	3		TC172671	0_1_2		Phenylpropanoids/flavonoids	Acyltransferase							y peel up
Les.4412.1.A1_at / Les.695.1.A1_at	20		TC181836	0_1_2		Phenylpropanoids/flavonoids	Flavanone 3-hydroxylase (F3H)							y peel up
LesAffx.11323.1.A1_at	2		AI899336	1_0_2		Photosynthesis	Cytochrome b6-f complex subunit 4							y peel down
LesAffx.65143.1.S1_at	2		TC190272	1_0_2		Photosynthesis	Cytochrome b559 beta subunit							y peel down
Les.3046.1.S1_at	14		TC171898	1_0_2		Photosynthesis	RuBisCO							y peel down
Les.3073.1.S1_at	15		TC170129	1_1_1		Photosynthesis	Photosystem II 22 kDa protein chloroplast precursor							y wt peel up
Les.4492.2.S1_at	3		TC170579	0_1_2		Photosynthesis	Chlorophyll a-b binding protein CP24 10B chloroplast precursor							y peel up
Les.2478.1.S1_at	3		AI780323	0_1_2		Photosynthesis	Chlorophyll a-b binding protein 3C-like							y peel up
Les.4083.1.S1_at	3	2	TC173972	0_1_2	0_1_2	Photosynthesis	Chlorophyll a-b binding protein 7 chloroplast precursor							y peel up and y flesh up
Les.2620.2.S1_at		2	TC175602		0_1_2	Photosynthesis	Photosystem II reaction center							y flesh up
Les.4228.3.S1_at		2	TC176585		0_1_2	Photosynthesis	Photosystem I reaction center							y flesh up
Les.1472.1.S1_at		2	TC187403		0_1_2	Photosynthesis	Photosystem II oxygen-evolving							y flesh up
Les.4794.1.S1_at		2	BT014116.1		1_0_2	Primary metabolism	NAD-malate dehydrogenase precursor							y flesh down
LesAffx.62009.1.S1_at		6	TC173993		1_0_2	Primary metabolism	Putative phosphofructokinase							y flesh down
Les.4275.1.S1_at		2	TC176756		1_0_2	Primary metabolism	Plastidic aldolase							y flesh down
Les.5245.1.S1_at	14		BT013560.1	2_0_1		Primary metabolism	Malate dehydrogenase							y peel down
Les.3039.1.S1_at	14		TC170008	1_0_2		Primary metabolism	Phospho-2-dehydro-3-deoxyheptonate aldolase 2 chloroplast precursor							y peel down
LesAffx.5010.1.S1_a_at	13		TC180478	1_0_2		Primary metabolism	Cytochrome b561							y peel down
Les.3358.1.S1_at	3		TC180850	1_0_2		Primary metabolism	Arginine decarboxylase							y peel down
Les.3358.1.S1_a_at	3		TC180850	1_1_1		Primary metabolism	Arginine decarboxylase							y wt peel up
Les.5221.1.S1_at	3		BT013523.1	0_1_2		Primary metabolism	Chlorophyllase-2							y peel up
Les.3072.1.S1_at	3		TC179722	0_1_2		Primary metabolism	Glyceraldehyde-3-phosphate dehydrogenase A subunit							y peel up
Les.2701.1.A1_at		2	TC176622		0_1_2	Primary metabolism	Tyrosine aminotransferase							y flesh up
Les.5627.1.S1_at		17	BT014278.1		1_0_2	Protein metabolism	Putative palmitoyl-protein thioesterase							y flesh down
Les.2942.1.S1_at		20	TC173657		1_0_2	Protein metabolism	Elongation factor							y flesh down
Les.3311.3.S1_at		16	TC174548		1_0_2	Protein metabolism	Isocitrate dehydrogenase							y flesh down
Les.3071.2.S1_at		6	TC177632		1_0_2	Protein metabolism	Lysine-ketoglutarate reductase							y flesh down
Les.3299.2.A1_s_at / LesAffx.1.1.S1_at		2	TC185848		1_0_2	Protein metabolism	Arginase 2							y flesh down
Les.5648.1.S1_at	16	16	BT014316.1	0_1_2	1_0_2	Protein metabolism	Cysteine proteinase							y flesh down and y peel up
LesAffx.18735.1.S1_at		12	BI922952		0_1_2	Protein metabolism	Chloroplast 30S ribosomal protein S3							y flesh up
LesAffx.29104.1.S1_at		2	TC175844		0_1_2	Protein metabolism	Ribosomal protein L3B							y flesh up
LesAffx.66215.1.S1_at		15	TC183701		0_1_2	Protein metabolism	Nucellin-like protein							y flesh up
LesAffx.41381.1.S1_at	2		AI894551	1_0_2		Protein metabolism	Eukaryotic initiation factor 4A-14							y peel down
Les.3228.1.S1_at	11		TC171575	2_0_1		Protein metabolism	Cysteine protease							y peel down
LesAffx.68108.1.S1_at	17		TC174295	1_0_2		Protein metabolism	Poly(A)-binding protein C-terminal interacting protein 6							y peel down
LesAffx.11659.1.A1_at	13		TC179086	1_0_2		Protein metabolism	Fumarylacetoacetase							y peel down
Les.702.1.S1_at	6	8	TC175504	1_0_2	1_0_2	Protein metabolism	S-adenosylmethionine decarboxylase (SamDC)							y peel down and y flesh down
Les.5240.1.S1_at	3		BT013554.1	0_1_2		Protein metabolism	Subtilisin-like protease							y peel up
Les.1422.1.S1_at	4		TC169890	0_1_2		Protein metabolism	Cysteine proteinase							y peel up
Les.2960.1.A1_at	3		TC175959	0_1_2		Protein metabolism	Carboxypeptidase							y peel up
Les.3619.1.S1_at	6	5	TC178155	0_1_2	1_0_2	Protein metabolism	Ethylene-responsive proteinase inhibitor 1 precursor							y peel up and y flesh down
Les.4803.1.S1_at	19	9	BT013418.1	0_2_1	0_1_2	Protein metabolism	Proline oxidase/dehydrogenase							y peel up and y flesh up
LesAffx.64054.3.S1_at		2	AW037801		1_0_2	Response to stress/defence	Glutathione S-transferase							y flesh down
LesAffx.3568.3.A1_at		10	CK715907		1_0_2	Response to stress/defence	Cold-stress inducible protein							y flesh down
Les.3668.1.S1_at		17	TC170695		1_0_2	Response to stress/defence	Lipoxygenase							y flesh down
Les.2886.1.A1_at		2	TC174345		1_0_2	Response to stress/defence	Flower-specific gamma-thionin-like protein							y flesh down
Les.2012.1.S1_at		2	TC180465		1_0_2	Response to stress/defence	Inositol-3-phosphate synthase (IPS)							y flesh down
Les.2668.1.S1_at		6	TC183059		1_0_2	Response to stress/defence	Auxin and ethylene responsive GH3-like protein							y flesh down
LesAffx.8748.1.A1_at		6	TC183521		1_0_2	Response to stress/defence	Putative acid phosphatase type 5							y flesh down
Les.827.1.S1_at		20	TC185742		1_0_2	Response to stress/defence	GAST1 protein precursor (gibberellin-regulated protein)							y flesh down
Les.4855.1.S1_at		2	BT012770.1		0_1_2	Response to stress/defence	Hypersensitive-induced response protein							y flesh up
Les.5654.1.S1_at		8	BT014325.1		0_1_2	Response to stress/defence	RING-H2 subgroup RHE protein							y flesh up
Les.167.1.S1_at		3	TC169955		0_1_2	Response to stress/defence	Superoxide dismutase							y flesh up
LesAffx.43379.1.S1_at		2	TC170960		0_1_2	Response to stress/defence	STS14 protein precursor							y flesh up
Les.123.1.S1_at		12	TC171342		0_1_2	Response to stress/defence	Glutathione S-transferase							y flesh up
Les.253.1.S1_at		2	TC177645		0_1_2	Response to stress/defence	Dehydration-induced protein (RD22)							y flesh up
LesAffx.69210.1.S1_at		14	TC179987		0_1_2	Response to stress/defence	Cysteine proteinase inhibitor							y flesh up
Les.3034.1.S1_at		2	TC180501		0_1_2	Response to stress/defence	Proteinase inhibitor precursor							y flesh up
Les.5939.1.S1_at		8	TC180524		0_1_2	Response to stress/defence	Avr9/Cf-9 rapidly elicited protein							y flesh up
LesAffx.27206.1.S1_at	14		BE459326	2_0_1		Response to stress/defence	Glutathione S-transferase							y peel down
Les.5672.1.S1_at	14		BT014363.1	2_0_1		Response to stress/defence	Putative protein kinase							y peel down
LesAffx.63074.1.S1_at	3		TC170184	1_0_2		Response to stress/defence	Avr9/Cf-9 rapidly elicited protein							y peel down
Les.266.1.S1_a_at	14		TC170549	1_0_2		Response to stress/defence	Prosystemin							y peel down
Les.3777.1.S1_at	10		TC170993	1_0_2		Response to stress/defence	Twi1 protein							y peel down
Les.3581.1.S1_at	6		TC172137	1_0_2		Response to stress/defence	Class II small heat shock protein (Le-HSP17.6)							y peel down
Les.2026.1.S1_at	17		TC172722	1_0_2		Response to stress/defence	Ring domain containing protein							y peel down
LesAffx.58365.1.S1_at	6		TC173455	1_0_2		Response to stress/defence	Heat shock protein binding							y peel down
Les.182.1.S1_at	14		TC174874	1_0_2		Response to stress/defence	Benzoyl transferase							y peel down
Les.2121.1.A1_at	14		TC179101	1_0_2		Response to stress/defence	Hydroxyproline-rich systemin precursor							y peel down
LesAffx.66253.1.S1_at	13	19	TC177496	1_0_2	1_0_2	Response to stress/defence	NL0D protein							y peel down and y flesh down
Les.1645.1.A1_at	11	18	TC185053	1_0_2	1_0_2	Response to stress/defence	Glutathione S-transferase							y peel down and y flesh down
LesAffx.47142.1.S1_at	1	6	TC187410	2_0_1	1_0_2	Response to stress/defence	Glutathione S-transferase							y peel down and y flesh down
LesAffx.3163.1.S1_at	17	8	TC172334	1_0_2	0_1_2	Response to stress/defence	Zinc finger A20 and AN1 domain							y peel down and y flesh up
Les.178.1.S1_at	3		BT012841.1	0_1_2		Response to stress/defence	Polygalacturonase inhibitor protein precursor							y peel up
Les.4307.1.S1_at	2		TC170583	0_1_2		Response to stress/defence	PR5-like protein							y peel up
Les.3739.1.S1_at	6		TC172016	0_1_2		Response to stress/defence	Small heat shock protein							y peel up
Les.3677.1.S1_at	6		TC172124	0_1_2		Response to stress/defence	Small heat shock protein							y peel up
LesAffx.46815.2.S1_at	3		TC173366	0_1_2		Response to stress/defence	Leucine rich repeat protein precursor							y peel up
LesAffx.344.5.S1_at	16		TC182213	0_1_2		Response to stress/defence	Snakin2 precursor							y peel up
Les.413.1.S1_s_at	3		TC189521	0_1_2		Response to stress/defence	Glutathione S-transferase							y peel up
LesAffx.69215.1.S1_at	3	17	TC181576	0_1_2	1_0_2	Response to stress/defence	Polygalacturonase inhibitor-like protein							y peel up and y flesh down
Les.4496.1.S1_at	2	3	TC170338	0_1_2	2_1_0	Response to stress/defence	Pathogenesis-related protein							y peel up and y wt flesh up
LesAffx.62593.1.S1_at	3	8	TC175056	0_1_2	1_2_0	Response to stress/defence	Avr9/Cf-9 rapidly elicited protein							y peel up and y wt flesh up
Les.2832.1.S1_at	8		TC189383		1_1_1	Response to stress/defence	Peroxidase precursor							y wt flesh up
Les.3550.1.S1_at	6		TC169981	1_1_1		Response to stress/defence	Heat shock protein (Hsc70)							y wt peel up
LesAffx.69957.1.S1_at	6		TC173955	1_1_1		Response to stress/defence	Heat shock protein							y wt peel up
LesAffx.56301.1.S1_at	2		TC177892	1_1_1		Response to stress/defence	TMV-induced protein I							y wt peel up
Les.4150.1.S1_at	6		TC187014	1_1_1		Response to stress/defence	Mitochondrial small heat shock protein							y wt peel up
Les.3160.2.S1_at	3	9	TC179427	1_1_1	0_1_2	Response to stress/defence	Heat shock protein							y wt peel up and y flesh up
LesAffx.15265.1.S1_at	17		TC173453	1_0_2		Secondary metabolism	Carnitine racemase							y peel down
LesAffx.54483.1.S1_at	14		TC180927	1_0_2		Secondary metabolism	S-adenosylmethionine-dependent methyltransferase							y peel down
LesAffx.46142.1.S1_at	2		TC182343	1_0_2		Secondary metabolism	S-adenosylmethionine-dependent methyltransferase							y peel down
LesAffx.28505.1.S1_at	6		TC184428	1_0_2		Secondary metabolism	Perakine reductase							y peel down
LesAffx.65870.1.S1_at	6		TC190707	1_0_2		Secondary metabolism	Perakine reductase							y peel down
Les.1650.1.A1_at	4		TC188260	0_1_2		Secondary metabolism	Tropinone reductase							y peel up
Les.5322.1.S1_at		9	BT013710.1		0_1_2	Signal transduction	Protein kinase							y flesh up
LesAffx.17130.1.S1_at		5	CK715835		0_1_2	Signal transduction	Unknown							y flesh up
Les.738.1.S1_at		2	TC171005		0_1_2	Signal transduction	Serine/threonine protein kinase							y flesh up
Les.3334.2.S1_at		1	TC178546		0_1_2	Signal transduction	Protein kinase CPK1							y flesh up
LesAffx.44071.1.S1_at		8	TC183296		0_1_2	Signal transduction	Similar to axi 1 protein							y flesh up
Les.2063.1.A1_at		5	TC190825		0_1_2	Signal transduction	Photoregulatory zinc-finger protein COP1							y flesh up
LesAffx.24096.1.S1_at	17		AJ785329	1_0_2		Signal transduction	Gibberellin induced protein							y peel down
Les.4613.1.S1_at	17		BT013526.1	1_0_2		Signal transduction	Petunia Shaggy kinase 4 (PSK4)							y peel down
Les.4312.2.S1_at	4		TC177501	1_0_2		Signal transduction	Receptor-like protein kinase							y peel down
Les.1331.1.A1_at	14		TC189377	1_0_2		Signal transduction	Protein kinase							y peel down
LesAffx.8708.1.S1_at	16		AW033860	0_1_2		Signal transduction	Receptor-like protein kinase							y peel up
LesAffx.16424.1.S1_s_at	17		TC178062	0_1_2		Signal transduction	Mitogen-activated protein kinase 3							y peel up
Les.1197.2.A1_at	3		TC178129	0_1_2		Signal transduction	Putative 7-transmembrane G-protein-coupled receptor							y peel up
Les.3338.1.S1_at	3	2	TC183169	0_1_2	0_1_2	Signal transduction	S-adenosyl-L-methionine synthetase-like							y peel up and y flesh up
Les.2027.3.S1_at	12	8	TC182800	1_1_1	0_1_2	Signal transduction	Protein kinase							y wt peel up and y flesh up
Les.4929.1.S1_at		2	BT012922.1		1_0_2	Transcription factor activity	Homeobox protein							y flesh down
Les.3065.2.A1_at		2	TC173627		1_0_2	Transcription factor activity	Squamosa promoter-binding protein transcription factor							y flesh down
LesAffx.37115.1.S1_at		16	TC178581		2_0_1	Transcription factor activity	MADS-box transcription factor							y flesh down
Les.349.1.S1_at		1	TC181747		1_0_2	Transcription factor activity	Transcription factor							y flesh down
Les.5130.1.S1_at	6	6	BT013342.1	0_1_2	1_0_2	Transcription factor activity	ABI3 transcription factor							y flesh down and y peel up
LesAffx.54522.1.S1_at		13	TC171391		0_1_2	Transcription factor activity	MYB transcription factor							y flesh up
Les.1864.1.S1_at		2	TC177189		0_1_2	Transcription factor activity	BHLH transcription factor							y flesh up
Les.3984.1.S1_at		2	TC179486		0_1_2	Transcription factor activity	Dehydration responsive element binding protein							y flesh up
LesAffx.3606.1.S1_at		8	TC180148		0_2_1	Transcription factor activity	MYB transcription factor							y flesh up
Les.1871.1.S1_at	17		TC170191	2_0_1		Transcription factor activity	RING-H2 finger protein							y peel down
LesAffx.64675.1.S1_a_at	3		TC172779	1_0_2		Transcription factor activity	BHLH transcription factor							y peel down
Les.41.1.S1_at	14		TC174616	2_0_1		Transcription factor activity	THM27 - MYB transcription factor (TMH27)							y peel down
LesAffx.55861.1.S1_at	17		TC179663	1_0_2		Transcription factor activity	Zinc-finger transcription factor							y peel down
LesAffx.2632.2.S1_at	17		TC181595	1_0_2		Transcription factor activity	Homeobox transcription factor							y peel down
Les.546.1.A1_at	7		TC182353	1_0_2		Transcription factor activity	WRKY transcription factor							y peel down
LesAffx.24696.1.S1_at	6		TC182754	1_0_2		Transcription factor activity	Heat shock transcription factor							y peel down
LesAffx.50750.1.S1_at	14		TC184379	2_0_1		Transcription factor activity	SlMYB4-like - MYB transcription factor							y peel down
Les.46.1.S1_at	13	6	X60760.1	1_0_2	1_0_2	Transcription factor activity	MADS-box transcription factor (TDR8)							y peel down and y flesh down
Les.5571.1.S1_at	17		AJ784436	0_1_2		Transcription factor activity	Ethylene response transcription factor 4							y peel up
Les.5760.1.S1_at	3		BT014516.1	0_1_2		Transcription factor activity	Plant vascular transcription factor							y peel up
Les.3379.1.S1_at	8		TC183690	0_1_2		Transcription factor activity	AP2 factor							y peel up
Les.3679.1.S1_at	2	4	TC174512	0_1_2	1_0_2	Transcription factor activity	Ethylene-responsive transcription factor (ERF1)							y peel up and y flesh down
Les.1708.1.S1_at	3	2	TC184502	0_2_1	0_1_2	Transcription factor activity	MYC1 (bHLH) transcription factor							y peel up and y flesh up
Les.4139.1.S1_at	9	4	TC170565	0_1_2	0_1_2	Transcription factor activity	ERF4- AP2 factor							y peel up and y flesh up
LesAffx.4793.1.S1_at	17	8	TC175616	0_1_2	1_1_1	Transcription factor activity	Putative WRKY transcription							y peel up and y wt flesh up
Les.5958.1.S1_at	17	8	TC179799	0_1_2	1_1_1	Transcription factor activity	Putative CCR4 transcription factor							y peel up and y wt flesh up
Les.5699.1.S1_at	12		BT014403.1	1_1_1		Transcription factor activity	NAC transcription factor							y wt peel up
LesAffx.29850.1.S1_at		2	AI896828		1_0_2	Transporter activity	Putative mitochondrial dicarboxylate carrier protein							y flesh down
LesAffx.65020.2.S1_at		2	BF113999		1_0_2	Transporter activity	Uncoupling protein							y flesh down
LesAffx.16710.2.S1_at		10	TC184589		1_0_2	Transporter activity	Aquaporin							y flesh down
LesAffx.67592.1.S1_at		16	TC185248		1_0_2	Transporter activity	Nonspecific lipid-transfer protein							y flesh down
Les.452.1.S1_at		2	BT013080.1		0_1_2	Transporter activity	ABC transporter							y flesh up
Les.177.1.S1_at		9	TC170301		0_1_2	Transporter activity	Putative sugar transporter							y flesh up
Les.119.1.S1_at		12	TC171321		0_1_2	Transporter activity	Putative aquaporin							y flesh up
LesAffx.47116.1.S1_at		9	TC180780		0_1_2	Transporter activity	Lysosomal Cystine Transporter							y flesh up
Les.5279.1.S1_at	10		BT013629.1	1_0_2		Transporter activity	Amino acid transporter protein							y peel down
LesAffx.55216.1.S1_at	4		TC176855	1_0_2		Transporter activity	Auxin transporter							y peel down
LesAffx.12670.1.S1_at	5		TC178428	1_0_2		Transporter activity	Carbohydrate transporter							y peel down
LesAffx.12670.3.S1_at	5		TC178428	1_1_1		Transporter activity	Carbohydrate transporter							y wt peel up
Les.2044.2.S1_at	4		TC186221	1_0_2		Transporter activity	Potassium channel							y peel down
Les.4073.1.S1_at	17	7	TC176558	1_0_2	1_0_2	Transporter activity	Amino acid transporter (LeAAP2)							y peel down and y flesh down
Les.5231.1.S1_at	3		BT013536.1	0_1_2		Transporter activity	Aquaporin							y peel up
Les.73.1.S1_at	4		TC169870	0_1_2		Transporter activity	Phosphate transporter							y peel up
LesAffx.286.2.S1_a_at	3		TC170408	0_1_2		Transporter activity	Aquaporin							y peel up
Les.2866.1.A1_at	3		TC172148	0_1_2		Transporter activity	Aquaporin							y peel up
Les.28.2.S1_a_at	8		TC186351	0_2_1		Transporter activity	Putative high-affinity nitrate transporter							y peel up
Les.3973.1.S1_at	4	16	TC182428	0_1_2	1_0_2	Transporter activity	Sucrose transport protein							y peel up and y flesh down
LesAffx.64583.1.S1_at	8		TC179801		1_1_1	Transporter activity	Antiporter activity							y wt flesh up
Les.3774.1.S1_at	3		TC169872	1_2_0		Transporter activity	Hexose transporter							y wt peel up
LesAffx.23347.1.S1_at		16	AI776728		1_0_2	Unknown	Unknow							y flesh down
Les.5146.1.S1_at		2	BT013382.1		1_0_2	Unknown	Unknow							y flesh down
Les.5191.1.S1_at		20	BT013476.1		1_0_2	Unknown	Formate-tetrahydrofolate ligase							y flesh down
LesAffx.13365.1.S1_at		6	TC171094		2_0_1	Unknown	Unknow							y flesh down
Les.220.1.S1_at		17	TC171127		1_0_2	Unknown	Transferase							y flesh down
Les.3403.2.S1_at		2	TC171978		1_0_2	Unknown	Phosphatase							y flesh down
Les.4021.1.A1_at		2	TC172043		1_0_2	Unknown	Unknow							y flesh down
Les.275.3.S1_at		6	TC172045		1_0_2	Unknown	Cytochrome P450 (CYP71 familly)							y flesh down
LesAffx.56797.1.S1_at		17	TC172126		1_0_2	Unknown	Nodulin like protein							y flesh down
Les.3040.1.S1_at		6	TC173001		2_0_1	Unknown	Unknow							y flesh down
Les.2414.1.S1_at		2	TC173114		1_0_2	Unknown	Unknow							y flesh down
LesAffx.3704.1.S1_at		6	TC173152		1_0_2	Unknown	Unknow							y flesh down
Les.2523.1.A1_at		10	TC174750		1_0_2	Unknown	Glycosyl transferase							y flesh down
LesAffx.17303.1.S1_at		6	TC176841		1_0_2	Unknown	Unknow							y flesh down
LesAffx.35593.1.S1_at		6	TC177287		1_0_2	Unknown	Unknow							y flesh down
LesAffx.68306.1.S1_at		6	TC177581		1_0_2	Unknown	Unknow							y flesh down
LesAffx.25133.1.S1_at		17	TC178504		1_0_2	Unknown	Unknow							y flesh down
LesAffx.18067.1.S1_at		2	TC178522		1_0_2	Unknown	Unknow							y flesh down
LesAffx.56104.1.S1_at		6	TC179616		1_0_2	Unknown	RING-H2 finger protein							y flesh down
LesAffx.30198.1.S1_at		2	TC179700		1_0_2	Unknown	Unknow							y flesh down
LesAffx.58502.1.S1_at		6	TC180042		1_0_2	Unknown	Hydrolase							y flesh down
Les.275.2.S1_at		6	TC182097		1_0_2	Unknown	Ribosomal DNA							y flesh down
Les.4334.2.S1_at		2	TC182426		2_0_1	Unknown	Unknow							y flesh down
Les.4397.1.S1_at		2	TC184331		1_0_2	Unknown	Unknow							y flesh down
LesAffx.17663.2.A1_at		18	TC184992		1_0_2	Unknown	Unknow							y flesh down
LesAffx.56070.1.S1_at		6	TC185186		2_0_1	Unknown	Unknow							y flesh down
LesAffx.56389.1.S1_at		16	TC186031		1_0_2	Unknown	Aldo/keto reductase							y flesh down
Les.672.1.S1_at		6	TC187056		1_0_2	Unknown	Cytochrome P450 (CYP96A5)							y flesh down
Les.4045.1.S1_at		6	TC188035		1_0_2	Unknown	Unknow							y flesh down
Les.5198.1.S1_at	6	6	BT013491.1	1_0_2	2_0_1	Unknown	Unknow							y flesh down and y peel down
LesAffx.56589.1.S1_at		5	AW036515		0_2_1	Unknown	Unknow							y flesh up
LesAffx.16111.1.S1_at		2	BE441170		0_1_2	Unknown	Unknow							y flesh up
Les.1718.1.A1_at		5	BG628334		0_1_2	Unknown	Unknow							y flesh up
Les.1787.1.A1_at		12	BG628780		0_1_2	Unknown	Unknow							y flesh up
Les.5251.1.S1_at		5	BT013566.1		0_1_2	Unknown	Calcium ion binding							y flesh up
Les.2501.1.S1_at		18	BT013655.1		0_1_2	Unknown	Unknow							y flesh up
Les.5522.1.S1_at		2	BT014069.1		0_2_1	Unknown	Unknow							y flesh up
Les.5683.1.S1_at		9	BT014382.1		0_1_2	Unknown	Disulfide oxidoreductase							y flesh up
Les.5927.1.S1_at		8	CK715580		0_1_2	Unknown	Unknow							y flesh up
LesAffx.10301.1.A1_at		12	CK715878		0_1_2	Unknown	Unknow							y flesh up
Les.2572.2.S1_a_at		1	TC170011		0_1_2	Unknown	Unknow							y flesh up
LesAffx.44395.1.S1_at		12	TC172077		0_1_2	Unknown	Unknow							y flesh up
LesAffx.16884.1.S1_at		9	TC173021		0_1_2	Unknown	Putative ripening-related hydrolase							y flesh up
LesAffx.68776.1.S1_at		15	TC173311		0_1_2	Unknown	Unknow							y flesh up
LesAffx.56638.1.S1_at		5	TC174274		0_1_2	Unknown	Unknow							y flesh up
Les.2409.1.S1_at		2	TC175021		0_1_2	Unknown	Unknow							y flesh up
LesAffx.60109.1.S1_at		2	TC176414		0_1_2	Unknown	Unknow							y flesh up
Les.3019.2.S1_at		2	TC176891		0_1_2	Unknown	Short-chain dehydrogenase							y flesh up
LesAffx.70732.1.S1_at		9	TC177948		0_2_1	Unknown	Unknow							y flesh up
LesAffx.49298.1.S1_at		9	TC178596		0_1_2	Unknown	Carbonate dehydratase - like protein							y flesh up
Les.557.1.S1_at		2	TC182878		0_1_2	Unknown	Calmodulin-like protein							y flesh up
Les.375.1.A1_at		2	TC183935		0_1_2	Unknown	Unknow							y flesh up
LesAffx.5435.1.S1_at		5	TC184079		0_1_2	Unknown	Cytochrome P450 (CYP4 familly)							y flesh up
LesAffx.34973.1.S1_at		15	TC185130		0_2_1	Unknown	Putative acetyltransferase							y flesh up
LesAffx.10113.1.A1_at		8	TC185161		0_1_2	Unknown	Unknow							y flesh up
Les.1455.1.S1_at		9	TC185286		0_1_2	Unknown	Hydrolase							y flesh up
Les.2264.1.S1_at		6	TC185537		0_1_2	Unknown	Unknow							y flesh up
Les.4727.1.S1_at		15	TC186201		0_2_1	Unknown	Oxidoreductase							y flesh up
LesAffx.69601.2.S1_at		2	TC188373		0_1_2	Unknown	Putative PAP-specific phosphatase							y flesh up
Les.4495.1.S1_at		5	TC189735		0_1_2	Unknown	Hydrolase							y flesh up
Les.1744.1.S1_at		2	TC191075		0_1_2	Unknown	RNA recognition motif containing protein							y flesh up
Les.701.1.A1_at	5		BG627000	1_0_2		Unknown	Unknow							y peel down
Les.1789.1.A1_at	14		BG629052	2_0_1		Unknown	Glutathione-dependent formaldehyde dehydrogenase							y peel down
Les.1945.1.A1_at	3		BG630386	1_0_2		Unknown	Unknow							y peel down
Les.5052.1.S1_at	6		BT013183.1	1_0_2		Unknown	Unknow							y peel down
Les.3687.1.S1_at	10		TC170035	1_0_2		Unknown	Tyramine N-hydroxycinnamoyl transferase (THT7-1)							y peel down
LesAffx.26054.1.S1_at	14		TC170400	1_0_2		Unknown	Unknow							y peel down
LesAffx.71654.1.S1_at	3		TC170875	1_0_2		Unknown	Unknow							y peel down
LesAffx.69782.1.S1_at	19		TC170997	1_0_2		Unknown	Unknow							y peel down
Les.2131.1.A1_at	12		TC172269	1_0_2		Unknown	Unknow							y peel down
LesAffx.65922.1.S1_at	2		TC173231	1_0_2		Unknown	Unknow							y peel down
Les.3343.2.S1_at	17		TC179590	1_0_2		Unknown	Unknow							y peel down
Les.4077.1.S1_at	14		TC179647	1_0_2		Unknown	Metallothionein-like protein type 2 A (LeMT(A))							y peel down
Les.4355.1.S1_at	17		TC182993	1_0_2		Unknown	Unknow							y peel down
Les.2643.1.S1_at	2		TC183665	1_0_2		Unknown	Unknow							y peel down
Les.2344.1.A1_at	6		TC185553	1_0_2		Unknown	Anther-specific protein							y peel down
LesAffx.41862.1.S1_at	3		TC185612	1_0_2		Unknown	Hydrolase							y peel down
LesAffx.62549.1.S1_at	3		TC186947	1_0_2		Unknown	Hydrolase							y peel down
Les.4062.1.S1_at	6		TC187049	1_0_2		Unknown	Unknow							y peel down
LesAffx.61398.1.S1_at	14		TC187382	3_0_0		Unknown	Unknow							y peel down
Les.3142.1.A1_at	6		TC187735	1_0_2		Unknown	Unknow							y peel down
LesAffx.28195.1.S1_at	3		TC189675	1_0_2		Unknown	Hydrolase							y peel down
Les.4046.1.S1_at	6		Z29109.1	2_0_1		Unknown	Signal recognition particle 7S RNA (SRP)							y peel down
Les.3591.1.S1_at	2	11	TC171069	1_0_2	3_0_0	Unknown	Unknow							y peel down and y flesh down
LesAffx.37595.1.S1_at	12	8	TC172871	1_0_2	1_0_2	Unknown	Unknow							y peel down and y flesh down
Les.4034.1.A1_at	6	6	TC189976	1_0_2	1_0_2	Unknown	Ripening regulated protein (DDTFR20)							y peel down and y flesh down
Les.4034.1.S1_at	6	6	TC189976	2_0_1	2_0_1	Unknown	Ripening regulated protein(DDTFR20)							y peel down and y flesh down
Les.1699.2.S1_at	3	2	TC173239	1_0_2	0_1_2	Unknown	Unknow							y peel down and y flesh up
Les.1699.1.A1_at	3	2	TC177909	1_0_2	0_1_2	Unknown	Unknow							y peel down and y flesh up
LesAffx.53966.1.S1_at	17	2	TC184370	1_0_2	0_1_2	Unknown	Glycine-rich protein (LeGRP1)							y peel down and y flesh up
Les.2268.1.A1_at	17	16	TC178916	3_0_0	1_0_2	Unknown	Putative glycine-rich RNA binding protein							y peel down y flesh down
Les.3166.1.S1_at	3		AI775188	0_1_2		Unknown	Oxidoreductase							y peel up
LesAffx.14903.1.S1_at	3		AW429117	0_2_1		Unknown	Unknow							y peel up
Les.4615.1.S1_at	3		BE462687	0_1_2		Unknown	Unknow							y peel up
Les.1013.1.A1_at	3		BG628758	0_1_2		Unknown	Unknow							y peel up
Les.4849.1.S1_at	3		BT012755.1	0_1_2		Unknown	Short-chain dehydrogenase							y peel up
Les.4993.1.S1_at	5		BT013064.1	0_1_2		Unknown	Putative NADH dehydrogenase							y peel up
Les.5865.1.S1_at	3		BT013275.1	0_1_2		Unknown	Unknow							y peel up
Les.5523.1.S1_at	17		BT014071.1	0_1_2		Unknown	Unknow							y peel up
Les.327.1.S1_at	6		BT014378.1	0_1_2		Unknown	Unknow							y peel up
Les.4223.1.S1_at	7		TC169923	0_1_2		Unknown	Alternative oxidase							y peel up
Les.3637.1.S1_at	3		TC171279	0_1_2		Unknown	Branched-chain-amino-acid transaminase activity							y peel up
LesAffx.59056.1.S1_at	15		TC171402	0_1_2		Unknown	Unknow							y peel up
Les.1077.1.S1_at	20		TC173141	0_1_2		Unknown	Unknow							y peel up
LesAffx.57454.1.S1_at	4		TC175978	0_1_2		Unknown	Calmodulin binding							y peel up
LesAffx.26417.1.S1_at	3		TC176376	0_1_2		Unknown	Unknow							y peel up
LesAffx.26417.2.S1_at	3		TC176376	0_2_1		Unknown	Unknow							y peel up
Les.898.1.A1_at	8		TC177505	0_1_2		Unknown	Unknow							y peel up
LesAffx.66342.1.S1_at	3		TC177649	0_1_2		Unknown	Unknow							y peel up
Les.2696.1.S1_at	17		TC177898	0_1_2		Unknown	Unknow							y peel up
LesAffx.71003.1.S1_at	3		TC178073	0_1_2		Unknown	Unknow							y peel up
Les.2700.1.S1_at	19		TC180408	0_1_2		Unknown	Putative polyprotein							y peel up
Les.1832.1.A1_at	3		TC180637	0_1_2		Unknown	Unknow							y peel up
LesAffx.27006.1.S1_at	3		TC181386	0_1_2		Unknown	Unknow							y peel up
Les.2164.1.A1_at	3		TC182694	0_1_2		Unknown	Phloem protein							y peel up
Les.641.1.S1_at	3		TC183873	0_1_2		Unknown	Unknow							y peel up
LesAffx.3635.2.A1_at	17		TC184538	0_1_2		Unknown	Calmodulin binding							y peel up
LesAffx.67482.1.S1_at	3		TC186383	0_1_2		Unknown	Unknow							y peel up
Les.1757.1.A1_at	3		TC191277	0_2_1		Unknown	Oxidoreductase							y peel up
LesAffx.65757.1.S1_at	4		TC171885	0_2_1		Wax/cutin	Fatty acid elongase-like protein (Cer2-like)							y peel up
Les.1153.1.S1_at	3		TC182303	0_2_1		Wax/cutin	Glycerol-3-phosphate dehydrogenase							y peel up
LesAffx.58351.1.S1_at	6	6	TC178188	0_1_2	1_0_2	Unknown	Unknow							y peel up and y flesh down
LesAffx.1345.1.S1_at	3	9	BF113815	0_1_2	0_1_2	Unknown	Unknow							y peel up and y flesh up
LesAffx.58075.1.S1_at	4	5	BI928092	0_1_2	0_1_2	Unknown	Unknow							y peel up and y flesh up
LesAffx.6294.1.S1_at	20	2	TC173084	0_3_0	0_2_1	Unknown	Unknow							y peel up and y flesh up
LesAffx.15004.1.S1_at	6	5	TC177005	0_1_2	0_1_2	Unknown	Unknow							y peel up and y flesh up
Les.180.1.S1_at	20	14	TC177136	0_3_0	0_3_0	Unknown	Annexin							y peel up and y flesh up
Les.1672.1.S1_at	3	2	TC182046	0_1_2	0_1_2	Unknown	Calmodulin-like protein							y peel up and y flesh up
LesAffx.55337.1.S1_at	4	17	TC172551	0_1_2	0_1_2	Wax/cutin	3-ketoacyl-CoA synthase (KCS)							y peel up and y flesh up
Les.971.1.A1_at	4	17	TC173257	0_1_2	0_1_2	Wax/cutin	Very-long-chain fatty acid condensing enzyme (CUT1)							y peel up and y flesh up
LesAffx.3630.1.S1_at	6		TC180065		1_1_1	Unknown	Unknow							y wt flesh up
LesAffx.64990.1.S1_at	3	9	TC170136	1_1_1	0_1_2	Unknown	Unknow							y wt peel up and y flesh up

## Sheet: Legend
Cluster - Expression profile cluster (Figure S3), which includes this transcript.
Identifier - GeneBank ID is given in case no TC is available.
Summary- Number of stages showing significantly altered probe intensity in the specified tissue. 1'st column: Y downregulated, 2'nd column: Y upregulated, 3'rd column: not altered.
Annotation - In most cases annotation is based on known/studied closest homologues/orthologue from other species.
Br/Or/Red - represent the stage of development in which the differences between the genotypes occure.
Red cells represent probes that were up-regulated in y fruit tissues.
Blue cells represent probes that were down-regulated in y fruit tissues.
Green cells are different probes representing same transcript.
