# Supplementary material for: Fruit-Surface Flavonoid Accumulation in Tomato Is Controlled by a SlMYB12-Regulated Transcriptional Network
Source: PLoS Genet. 2009 Dec 18;5(12):e1000777. doi: 10.1371/journal.pgen.1000777 (PMC2788616; doi:10.1371/journal.pgen.1000777)
Supplement: Table S2 — List of putative metabolites identified in tomato fruit peel and flesh by UPLC-QTOF-MS analysis. (0.13 MB XLS) [file pgen.1000777.s013.xls]

## Sheet: UPLC-QTOF-MS metabolites
Table S2: List of putative metabolites identified in tomato fruit peel and flesh by UPLC-QTOF-MS analysis
	Ret . Time - Retention time, in minutes (difference in Ret.Time between ES(+) and ES(-) modes was less than 0.04 minutes)
	Putative Name - putative metabolite identification;
	Mol. Formula - molecular formula of the metabolite or its FA adduct;
	Theor. m/z - theoretical monoisotopic mass calculated for the ion (M-H)- , (M+H)+ or (M+FA)-
	Found m/z - mass found;
	m/z error (ppm) - difference between theoretical and found m/z values in ppm;
	MSMS fragments - fragments, obtained from the ion (M-H)- , (M+H)+ or (M+FA)-
	MS/MS CE (eV) - collision energy used for fragmentation;
	UV/Vis - UV/ Vis absorbance maxima;
	() FA - formic acid adduct
	(S) - identification confirmed by the standard compound;
	I, II, III - different isomers
	MOTO - this compound is present in MoTo database or in the article of Moco et al (2006) (see Refs.17, 18)
	MOTO-isomer - isomer of this compound is present in the MOTO database or in the article of Moco et al (2006) (see Refs.17, 18)
	a - These two owerlapped quercetin derivatives have similar structure, therefore we assume the similarity of their UV spectra
Peak no.	Ret. Time	Putative Name	Mol formula	ES(+) Theor m/z	ES(+) Found m/z	ES(-) Theor m/z	ES(-) Found m/z	m/z error (ppm)	MS/MS ES(+) fragments	MS/MS ES(+) CE (eV)	MS/MS ES(-) fragments	MS/MS ES(-) CE (eV)	UV/Vis	Detected in tomato or another specie	References
1	9.62	Esculeoside B	C56H93NO28	1228.6	1228.6	-	-	2.19763	MS/MS of 1228.6 ([M+H]+):	35	MS/MS of 1272.58 ([M+FA]-):	40	(-)	Tomato	MOTO
									1210.6, 1048.5, 772.4, 610.4		1226.5, 1094.5, 1064.5, 932.5, 770.4
2	11.74	Kaempferol-glucose-rhamnose	C27H30O15	595.166	595.165	-	-	1.30384	MS/MS of 595.16 ([M+H]+):	10	MS/MS of 593.15 ([M-H]-):	15	264, 347	Tomato	MOTO
									449.11, 287.06		285.04
3	17.58	Dehydrotomatine (S)	C50H81NO21	1032.54	1032.54	-	-	1.06534	MS/MS of 1032.54 ([M+H]+):	35	MS/MS of 1076.53 ([M+FA]-):	30	(-)	Tomato	Ref. 1
									1014.5, 900.5, 576.4, 414.4		1030.5, 898.5, 868.5
4	13.09	Dehydrolycoperoside G, Dehydrolycoperoside F or Dehydroescoleoside A	C58H93NO29	1268.59	1268.59	-	-	0.630621	MS/MS of 1268.6 ([M+H]+):	35	MS/MS of 1312.58 ([M+FA]-):	40	(-)	Tomato	MOTO
									1208.6, 1106.5, 1088.5, 1046.5		1266.6, 1134.5, 1104.5, 972.4, 810.4, 750.4
5	13.5	Lycoperoside G, Lycoperoside F or Esculeoside A I	C58H95NO29	1270.61	1270.6	-	-	1.57405	MS/MS of 1270.6 ([M+H]+):	3, 35	MS/MS of 1314.59 ([M+FA]-):	40	(-)	Tomato	MOTO
									1210.61, 1108.56, 1090.55, 1048.54, 1030.53, 814.46, 652.40		1268.6, 1136.5, 1106.5, 974.5, 908.46, 812.4, 752.4
6	11.044	Lycoperoside G , Lycoperoside F, or Esculeoside A II	C58H95NO29	1270.61	1270.61	-	-	0.84684	MS/MS of 1270.63 ([M+H]+):	3, 25	MS/MS of 1314.60 ([M+FA]-):	40	(-)	Tomato	MOTO
									1090.56, 1030.53, 814.45, 652.41, 605.37, 443.32		1268.61, 1136.55, 1106.55, 974.50, 908.47, 812.43, 770.43, 752.39
7	17.94	Lycoperoside A, Lycoperoside B or Lycoperoside C I	C52H85NO23	1092.56	1092.56	-	-	0.54917	MS/MS of 1092.55 ([M+H]+):	35	MS/MS of 1136.54 ([M+FA]-):	40	(-)	Tomato	MOTO
									1074.6, 1032.6, 1003.5		1090.55,958.50, 928.49, 796.45, 730.41, 634.4
8	18.48	(Lycoperoside A) FA, (Lycoperoside B) FA or (Lycoperoside C) FA II	(C52H85NO23) HCOOH	-	-	1136.55	1136.55	0.946725	MS/MS of 1092.55 ([M+H]+):	25	MS/MS of 1136.54 ([M+FA]-):	40	(-)	Tomato	MOTO
									1074.6, 1032.6, 1003.5		1090.55, 958.50, 928.49, 796.45, 730.41, 634.4, 143.03
9	12.6	(Lycoperoside H) FA or (Hydroxy-α-Tomatine) FA I	(C50H83NO22) HCOOH	-	-	1094.54	1094.54	2.53623	MS/MS of 1050.55 ([M+H]+):	25	MS/MS of 1094.53 ([M+FA]-):	40	(-)	Tomato	MOTO-isomer
									1032.5, 414.3		1048.5, 916.5, 886.5, 754.4, 688.4, 592.4, 143.0
10	13.71	Lycoperoside H or Hydroxy-a-Tomatine II	C50H83NO22	1050.55	1050.55	-	-	1.6182	MS/MS of 1050.55 ([M+H]+):	35	MS/MS of 1094.54 ([M+FA]-):	40	(-)	Tomato	MOTO
									1032.6, 594.4, 576.4, 432.4, 414.4, 273.2		1048.5, 916.5, 886.5, 754.4, 688.4, 592.4, 143.0
11	14.15	(Lycoperoside H) FA or (Hydroxy-α-Tomatine) FA III	(C50H83NO22) HCOOH	-	-	1094.54	1094.54	1.34851	MS/MS of 1050.55 ([M+H]+):	25	MS/MS of 1094.53 ([M+FA]-):	40	(-)	Tomato	MOTO-isomer
									1032.6, 594.4, 576.4, 432.4, 414.4, 273.2		1048.5, 916.5, 886.5, 754.4, 688.4, 592.4, 143.0
12	15.0753	Hydroxy-Lycoperoside A, Hydroxy-Lycoperoside B or Hydroxy-Lycoperoside C	C52H85NO24	1108.55	1108.55	-	-	0.609804	MS/MS of 1108.55 ([M+H]+):	25	MS/MS of 1152.50 ([M+FA]-):	40	(-)
									1090.57, 1048.55		1106.54, 974.50, 944.45, 812.44, 746.41, 650.39
13	18.22	α-Tomatine (S)	C50H83NO21	1034.55	1034.55	-	-	1.15992	MS/MS of 1034.55 ([M+H]+):	30	MS/MS of 1078.54 ([M+FA]-):	35	(-)	Tomato	MOTO
									1016.5, 578.4, 416.4		1032.5, 900.5, 870.5, 672.5, 576.3
14	3.14	Pantothenic acid -hexose	C15H27NO10			380.158	380.157	0.789147	MS/MS of 382.17 ([M+H]+):	15,30	MS/MS of 380.15 ([M-H]-):	15	(-)	Tomato	MOTO
									220.12, 202.11, 184.09, 90.05		362.14, 308.15, 146.08
15	5.11	Quercetin-dihexose-pentose-deoxyhexose	C38H48O25	905.256	905.258	-	-	2.6777	MS/MS of 905.25 ([M+H]+):	10	MS/MS of 903.2 ([M-H]-):	15	254, 355	Tomato	MOTO-isomer
									773.22,759.20, 743.20, 627.15, 611.16, 597.15, 465.10, 303.05		741.2
16	5.7	Quercetin-dihexose-deoxyhexose	C33H40O21	773.213	773.214	-	-	0.41903	MS/MS of 773.21 ([M+H]+):	10	MS/MS of 771.19 ([M-H]-):	30	254, 353	Tomato	MOTO
									627.15, 611.16, 465.10, 303.05		609.14,462.08, 301.04
17	13.92	Quercetin-dihexose-deoxyhexose-p-coumaric acid	C42H46O23	919.25	919.253	-	-	2.52815	MS/MS of 919.25 ([M+H]+):	10	MS/MS of 917.23 ([M-H]-):	30	255, 268, 295-sh,	Ochradenus baccatus	Ref. 2
									773.19, 611.16, 465.10, 455.16, 309.09, 303.05		741.18, 723.17, 300.02, 179		321a
18	9.17	Quercetin-hexose-deoxyhexose-pentose	C32H38O20	743.203	743.201	-	-	2.38966	MS/MS of 743.2 ([M+H]+):	10	MS/MS of 741.19 ([M-H]-):	30	255, 352	Tomato	MOTO
									611.16, 597.14, 465.10,449.10, 303.05, 279.11		300.03
19	13.9154	Quercetin-hexose-deoxyhexose-pentose-p-coumaric acid	C41H44O22	889.24	889.242	-	-	2.2761	MS/MS of 889.24 ([M+H]+):	10	MS/MS of 887.2 ([M-H]-):	30	255, 268, 295-sh,	Tomato	MOTO
									743.18, 611.16, 465.10, 425.14, 303.05, 279.09		741.18, 723.18, 300.0, 179.0		321a
20	10.16	Rutin (S)	C27H30O16	611.161	611.161	-	-	0.693762	MS/MS of 611.16 ([M+H]+):	10	MSMS of 609.15 ([M-H]-):	30	255, 353	Tomato	MOTO
									465.10, 303.05		300.03, 271.02, 255.03, 175, 151
21	10.4083	Kaempferol-hexose-deoxyhexose-pentose	C32H38O19	727.208	727.207	-	-	1.0671	MS/MS of 727.2 ([M+H]+):	10	MS/MS of 725.2 ([M-H]-):	30	264, 346	Tomato	MOTO
									595.16, 449.10, 287.05		284.03
22	19.17	Naringenin (S)	C15H12O5	273.076	273.076	-	-	0.64451	MS/MS of 273.07 ([M+H]+):	25	MS/MS of 271.06 ([M-H]-):	30	289, 330-sh	Tomato	MOTO
									153.02, 147.04, 119.05		177.02, 151.0, 119.05, 107.01
23	19.78	Naringenin chalcone (S)	C15H12O5	273.076	273.075	-	-	2.1093	MS/MS of 273.07 ([M+H]+):	25	MS/MS of 271.06 ([M-H]-):	30	366	Tomato	MOTO
									153.02, 147.04, 119.05		177.02, 151.0, 119.05, 107.01
24	9.97	Naringenin chalcone-dihexose	C27H32O15	597.181	597.183	-	-	2.38454	MS/MS of 597.18 ([M+H]+):	10	MS/MS of 595.16 ([M-H]-):	15	356	Tomato	MOTO-isomer
									435.13, 273.08		457.11, 433.11, 271.06
25	13.74	Naringenin chalcone-hexose I	C21H22O10	-	-	433.114	433.114	0.517185	MS/MS of435.12 ([M+H]+):	25	MS/MS of 433.11 ([M-H]-):	15	359	Tomato	MOTO-isomer
									273.07, 153.02, 147.05		271.06, 151.0
26	15.15	Naringenin chalcone-hexose II	C21H22O10	-	-	433.114	433.114	0.0554127	MS/MS of435.12 ([M+H]+):	25	MS/MS of 433.11 ([M-H]-):	15	367	Tomato	MOTO
									273.07, 153.02, 147.05		313.05, 271.06, 151.0
27	15.39	Naringenin chalcone-hexose III	C21H22O10	-	-	433.114	433.113	1.67162	MS/MS of435.12 ([M+H]+):	25	MS/MS of 433.11 ([M-H]-):	15	367	Tomato	MOTO
									273.07, 153.02, 147.05		313.07, 295.06, 271.06, 151.0
28	12.75	Naringenin hexose	C21H22O10	-	-	433.114	433.115	2.02256	MS/MS of435.12 ([M+H]+):	25	MS/MS of 433.11 ([M-H]-):	15	282, 334	Tomato	MOTO-isomer
									273.07, 153.02, 147.05		271.06, 151.0
29	6.26	Naringenin -dihexose I	C27H32O15	597.181	597.183	-	-	3.2218	MS/MS of 597.18 ([M+H]+):	10	MS/MS of 595.16 ([M-H]-):	15	287, 338-sh	Tomato	MOTO
									561.16, 543.15, 525.14, 483.12, 549.13, 441.11		475.12, 385.09, 355.08
30	11.14	Naringenin-dihexose II	C27H32O15	597.181	597.182	-	-	1.37982	MS/MS of 597.18 ([M+H]+):	10	MS/MS of595.16 ([M-H]-):	15	290, 350-sh	Tomato	MOTO-isomer
									435.13, 273.07, 153.02		475.11, 433.11, 271.06
31	19.8469	Methyl ether of hydroxylated naringenin or Methyl ether of hydroxylated naringenin chalcone I	C16H14O6	303.086	303.086	-	-	1.57051	MS/MS of 303.08 ([M+H]+):	10	MS/MS of 301.07 ([M-H]-):	15	(-)
									179.04, 177.05, 153.02		151.0
32	13.48	Methyl ether of hydroxylated naringenin-hexose, or Methyl ether of hydroxylated naringenin chalcone-hexose I	C22H24O11	-	-	463.125	463.126	2.97112	MS/MS of 465.13 ([M+H]+):	25	MS/MS of 463.12 ([M-H]-):	30	(-)
									303.08, 177.06, 153.02		301.07, 151.0
33	14.36	Methyl ether of hydroxylated naringenin-hexose, or Methyl ether of hydroxylated naringenin chalcone-hexose II	C22H24O11	-	-	463.125	463.126	2.10742	MS/MS of 465.13 ([M+H]+):	25	MS/MS of 463.12 ([M-H]-):	15	(-)
									303.08, 177.05, 153.02		301.07
34	20.47	Methyl ether of hydroxylated naringenin or Methyl ether of hydroxylated naringenin chalcone II	C16H14O6	303.086	303.086	-	-	0.250754	MS/MS of 303.08 ([M+H]+):	10	MS/MS of 301.07 ([M-H]-):	15	(-)
									179.04, 177.05, 153.02		151.0
35	16.95	Hydroxylated naringenin chalcone	C15H12O6	289.071	289.07	-	-	2.33853	MS/MS of 289.07 ([M+H]+):	10	MS/MS of 287.05 ([M-H]-):	25	376
									179.03, 163.04, 153.02		151.00, 135.04, 107.02
36	16.07	Hydroxylated naringenin (Eriodictyol) (S)	C15H12O6	289.071	289.071	-	-	1.12083	MS/MS of 289.07 ([M+H]+):	10	MS/MS of 287.05 ([M-H]-):	25	(-)	Apple	Ref. 3
									179.03, 163.04, 153.02		151.00, 135.04, 107.02
37	10.42	Hydroxylated naringenin-hexose (Eriodictyol-hexose)	C21H22O11	-	-	449.109	449.108	2.05741	MS/MS of 451.2 ([M+H]+):	25	MS/MS of 449.11 ([M-H]-):	30	285, 330-sh
									289.07, 163.04, 153.02		287.06, 175.0, 151.0, 135.05, 107.01
38	5.39	Coumaric acid-hexose I	C15H18O8	-	-	325.093	325.092	2.53466	-	-	MS/MS of 325.09 ([M-H]-):	15	(-)	Tomato	MOTO
											163.04, 145.03, 119.05
39	3.59	Coumaric acid-hexose II	C15H18O8	-	-	325.093	325.092	1.91945	-	-	MS/MS of 325.09 ([M-H]-):	15	288	Tomato	MOTO
											163.04, 119.05
40	6.1661	Ferulic acid-hexose I	C16H20O9	-	-	355.103	355.104	1.90367	-	-	MS/MS of 355.10 ([M-H]-):	15	(-)	Tomato	MOTO-isomer
											235.06, 217.05, 193.05, 175.04, 160, 134.04
41	1.72	Hydroxybenzoic acid-hexose	C13H16O8	-	-	299.077	299.078	3.93209	-	-	MS/MS of 299.07 ([M-H]-):	15, 30	(-)	Tomato	MOTO
											137.02, 93.03
42	13.95	trans-Resveratrol (S)	C14H12O3	-	-	227.071	227.071	0.775087	-	-	MS/MS of 227.07 ([M-H]-):	15	(-)	Tomato	Ref. 4
											185.06, 143.04
43	12.04	Dicaffeoylquinic acid I	C25H24O12	-	-	515.12	515.121	2.08884	-	-	MS/MS of 515.12 ([M-H]-):	15	243, 298-sh, 330	Tomato	MOTO
											353.08, 335.08, 191.05, 179.03, 173.04
44	12.26	Dicaffeoylquinic acid II	C25H24O12	-	-	515.12	515.121	2.67122	-	-	MS/MS of 515.12 ([M-H]-):	15	243-sh, 298-sh, 326	Tomato	MOTO
											353.08, 191.05, 179.03
45	13.60	Dicaffeoylquinic acid III	C25H24O12	-	-	515.12	515.12	0.729928	-	-	MS/MS of 515.12 ([M-H]-):	15, 30	243-sh, 298-sh, 329	Tomato	MOTO
											353.08, 317.06, 299.05, 203.03, 191.05, 179.04, 173.05)
46	4.95	3-Caffeoylquinic acid (S)	C16H18O9	-	-	353.088	353.087	1.76727	-	-	MS/MS of 353.08 ([M-H]-):	15	290-sg, 328	Tomato	MOTO
											191.06
47	6.69	4-Caffeoylquinic acid	C16H18O9	-	-	353.088	353.087	0.917619	-	-	MS/MS of 353.08 ([M-H]-):	15	319	Tomato	MOTO
											191.06
48	5.47	5-Caffeoylquinic acid	C16H18O9	-	-	353.088	353.088	0.49846	-	-	MS/MS of 353.08 ([M-H]-):	15	(-)	Tomato	MOTO
											191.05, 179.03, 173.04, 135.04
49	3.48	Caffeic acid-hexose I	C15H18O9	-	-	341.088	341.089	2.56825	-	-	MS/MS of 341.08 ([M-H]-):	15	(-)	Tomato	MOTO
											203.04, 179.04, 135.05
50	4.25	Caffeic acid-hexose II	C15H18O9	-	-	341.088	341.089	4.32733	-	-	MS/MS of 341.08 ([M-H]-):	15	(-)	Tomato	MOTO
											281.07, 251.05,221.05, 179.04,161.02, 135.05
51	4.75	Caffeic acid-hexose III	C15H18O9	-	-	341.088	341.088	0.515996	-	-	MS/MS of 341.08 ([M-H]-):	15	(-)	Tomato	MOTO
											179.04, 135.05
52	6.32	Benzyl alcohol-hexose-pentose	C18H26O10	-	-	401.145	401.146	1.93446	-	-	MS/MS of 401.14 ([M-H]-):	15	(-)	Tomato	MOTO
											269.10, 233.06, 193.04, 161.04, 131.03, 101.02, 89.02, 71.01
53	5.07	Benzyl alcohol-dihexose	C19H28O11	-	-	431.156	431.155	1.44727	-	-	MS/MS of 431.15 ([M-H]-):	15	(-)	Tomato	MOTO
											269.11, 223.06, 161.05, 113.02, 101.02
54	2.29	Phenylalanine (S)	C9H11NO2	166.086	166.086	-	-	1.66179	MS/MS of 166.08 ([M+H]+):	10	MS/MS of 164.07 ([M-H]-):	15	(-)	Tomato	Ref. 5
									120.08		147.04, 103.05
55	18.3108	Tricaffeoylquinic acid	C34H30O15	-	-	677.151	677.152	0.850622			MS/MS of 677.15 ([M-H]-):	30	243, 298-sh, 327	Tomato	MOTO
											515.12, 353.08, 191.05, 179.03, 173.04
56	3.98	Tryptophan (S)	C11H12N2O2	205.097	205.097	-	-	1.09217	MS/MS of 205.09 ([M+H]+):	10	MS/MS of 203.08 ([M-H]-):	15	(-)	Tomato	Ref. 5
									188.07, 146.06		186.06, 159.09, 142.07, 116.05, 74.02
57	4.13	N-Feruloylputrescine-I	C14H20N2O3	265.155	265.155	-	-	0.467652	MS/MS of 265.15 ([M+H]+):	10	-	-	(-)	Tomato pistils	Ref. 6, 7
									248.12, 177.05, 145.03, 89.11, 72.08
58	5.0702	N-Feruloylputrescine-II	C14H20N2O3	265.155	265.155	-	-	0.467652	MS/MS of 265.15 ([M+H]+):	10	-	-	(-)	Tomato pistils	Ref. 6, 7
									248.12, 177.05, 145.03, 89.11, 72.08
59	4.68	Hydrocinnamic acid-hexose	C15H20O8	-	-	327.109	327.109	1.45517	-	-	MS/MS of 327.11 ([M-H]-):		(-)	Tomato	Ref. 8, 9
											165.06, 121.07, 93.03			Dendrobium plants
60	5.3	Ferulic acid-dihexose	C22H30O14	-	-	517.156	517.157	1.88724	-	-	MS/MS of 517.16 ([M-H]-):	30	(-)	Rice	Ref. 10
											193.05, 175.14, 160.02, 134.04
61	4.5	Ferulic acid-hexose II	C16H20O9	-	-	355.103	355.105	3.87493	-	-	MS/MS of 355.10 ([M-H]-):		(-)
											193.05, 178.03, 149.06, 134.04
62	6.52	Ferulic acid-hexose III	C16H20O9	-	-	355.103	355.103	0.349194	-	-	MS/MS of 355.10 ([M-H]-):		(-)
											193.05, 178.03, 149.06, 134.04
63	6.57	Caffeic acid-hexose IV	C15H18O9	-	-	341.088	341.089	1.98189	-	-	MS/MS of 341.09 ([M-H]-):		(-)
											179.03, 135.14
64	20.05	Phloretin (S)	C15H14O5	-	-	273.077	273.076	3.38366	-	-	MS/MS of 273.07 ([M-H]-):		(-)	Apple	Ref. 11
											167.04, 123.04, 119.05, 81.03			(glycosilated form)
65	11.33	Phloretin-di-C-hexose	C27H34O15	-	-	597.183	597.184	2.97397	MS/MS of 599.2 ([M+H]+):	10+25	MS/MS of 597.18 ([M-H]-):		232, 284, 330-sh	Tomato	Ref. 12
									581.2, 563.2, 545.2, 527.2, 497.2, 485.2, 479.2, 461.2, 431.2, 461.1, 449.1, 431.1, 419.1, 413.1, 407.1, 395.1, 383.1, 365.1,353.1, 341.1, 329.1, 301.1, 107.1		579.17, 507.15, 489.14, 477.14, 459.13, 417.12, 399.11, 387.11, 357.10, 345.10, 327.08, 315.08
66	8.44	Phloretin-trihexose	C33H44O20	-	-	759.235	759.237	2.60262	MS/MS of 761.23 ([M+H]+):		MS/MS of 759.23 ([M-H]-):		288, 330-sh
									743.23, 599.20, 581.19, 563.17, 479.16		741.21, 669.20, 651.16, 639.20, 621.18, 579.17, 549.15, 519.15
67	13.99	Feruloyltyramine I	C18H19NO4	314.139	314.138			2.78858	MS/MS of 314.14 ([M+H]+):	20			(-)	Potato	Ref. 13
									177.05, 145.03, 121.06					Tomato	Ref. 15
68	15.47	Feruloyltyramine I	C18H19NO4	314.139	314.137			6.92688	MS/MS of 314.14 ([M+H]+):	20			(-)	Potato	Ref. 13
									177.05, 145.03, 121.06					Tomato	Ref. 15
69	9.75	Feruloyltyramine-hexose	C24H29NO9	476.191	476.191			0.369599	MS/MS of 476.19 ([M+H]+):	25			(-)
									314.14, 177.06, 145.03, 121.06
70	3.32	Caffeoylputrescine	C13H18N2O3	251.139	251.139			1.68831	MS/MS of 251.14 ([M+H]+):	20			(-)	Tobacco	Ref14
									234.11, 163.04, 145.03, 135.04, 117.03, 89.04
71	6.88	Kaempferol-dihexose-deoxyhexose	C33H40O20	757.219	757.219			0.956131	MS/MS of 757.22 ([M+H]+):	20			(-)	Tomato	Ref. 15, 16
									611.16, 595.17, 449.11, 287.05
References:
1	Kozukue N, Han J-S, Lee K-R, Friedman M (2004) Dehydrotomatine and α-tomatine content in tomato fruits and vegetative plant tissues. Journal of Agricultural and Food Chemistry, 52(7): 2079-2083.
2	Barakat HH, El-Mousallamy AMD, Souleman AMA, Awadalla S (1991) Flavonoids of Ochradenus baccatus. Phytochemistry, 30(11): 3777-3779.
3	Sánchez-Rabaneda F, Jáuregui O, Lamuela-Raventós RM, Viladomat F, Bastida J, Codina C (2004) Qualitative analysis of phenolic compounds in apple pomace using liquid chromatography coupled to mass spectrometry in tandem mode. Rapid Commun. Mass Spectrom. 18: 553–563.
4	Ragab AS, Van Fleet J, Jankowski B, Park J-H, Bobzin SC (2006) Detection and Quantitation of Resveratrol in Tomato Fruit (Lycopersicon esculentum Mill.). Journal of Agricultural and Food Chemistry 54(19): 7175-7179.
5	Carrari F, Baxter C, Usadel B, Urbanczyk-Wochniak E, ZanorM-I, Nunes-Nesi A, Nikiforova V, Centero D, Ratzka A, Pauly M, Sweetlove L-J, Fernie AR (2006) Integrated analysis of metabolite and transcript levels reveals the metabolic shifts that underlie tomato fruit development and highlight regulatory aspects of metabolic network behavior. Plant Physiology 142: 1380–1396.
6	Leubner-Metzger G, Amrhein A (1993) The distribution of hydroxycinnamoylputrescines in different organs of Solanum tuberosum and other solanaceous species. Phytochemistry 32(3): 551-556.
7	Gális I, Šimek P, Narisawa T, Sasaki M, Horiguchi T, Fukuda H, Matsuoka K (2006) A novel R2R3 MYB transcription factor NtMYBJS1 is a methyl jasmonate-dependent regulator of phenylpropanoidconjugate jasmonate-dependent regulator of phenylpropanoidconjugate biosynthesis in tobacco. The Plant Journal 46: 573–592.
8	Yang L, Nakamura N, Hattori M, Wang Z, Bligh SWA, Xu L (2007) High-performance liquid chromatography-diode array detection/electrospray ionization mass spectrometry for the simultaneous analysis of cis-, trans- and dihydro-2-glucosyloxycinnamic acid derivatives from Dendrobium medicinal plants. Rapid Communications in Mass Spectrometry 21(12): 1833-1840.
9	Krammer GE, Buttery RG, Takeoka GR (1995) Studies on tomato glycosides. ACS Symposium Series, 596 (Fruit Flavors): 164-181.
10	Tian S, Nakamura K, Kayahara H (2004) Analysis of Phenolic Compounds in White Rice, Brown Rice, and Germinated Brown Rice. Journal of Agricultural and Food Chemistry, 52(15): 4808-4813.
11	Sánchez-Rabaneda F, Jáuregui O, Lamuela-Raventós R-M, Viladomat F, Bastida J, Codina C (2004) Qualitative analysis of phenolic compounds in apple pomace using liquid chromatography coupled to mass spectrometry in tandem mode. Rapid Commun. Mass Spectrom. 18: 553–563.
12	Slimestad R, Fossen T, Verheul M J (2008) The Flavonoids of Tomatoes. Journal of Agricultural and Food Chemistry, 56(7): 2436–2441.
13	King R R, Calhoun L A (2005) Characterization of cross-linked hydroxycinnamic acid amides isolated from potato common scab lesions. Phytochemistry, 66(20): 2468-2473.
14	Galis I, Kakiuchi Y, Simek P, Wabiko H. (2004) Agrobacterium tumefaciens AK-6b gene modulates phenolic compound metabolism in tobacco. Phytochemistry, 65(2): 169-179.
15	Iijima Y, Nakamura Y, Ogata Y, Tanaka K, Sakurai N, Suda K, Suzuki T, Suzuki H, Okazaki K, Kitayama M, Kanaya S, Aoki K, Shibata D. (2008) Metabolite annotations based on the integration of mass spectral information. The Plant Journal, 54: 949–962.
16	Le Gall G, Colquhoun IJ, Davis AL, Collins GJ, Verhoeyen ME (2003) Metabolite profiling of tomato (Lycopersicon esculentum) using 1H NMR spectroscopy as a tool to detect potential unintended effects following a genetic modification. Journal of Agricultural and Food Chemistry, 51(9): 2447-2456.
17	MoTo DB: http://appliedbioinformatics.wur.nl/moto/
18	Moco S, Bino RJ, Vorst O, Verhoeven HA, de Groot J, van Beek TA, Vervoort J, de Vos CHR (2006) A liquid chromatography mass spectrometry based metabolome database for tomato. Plant Physiology, 141: 1205–1218.
